# Supplementary material for: Factors associated with intended use of a maternity waiting home in Southern Ethiopia: a community-based cross-sectional study
Source: Springer Nature journal article supplement (doi:10.1186/s12884-018-1670-z), 2018-01-19
Supplement: MOESM2 [file 15389836]

**በማወቅ የሚሰጥ የስምምነት ቅጽ**

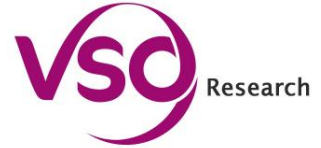

**የእናቶችን ጤና እና የነፈሰጡር እናቶች ማረፊያ ቤትን የተመለከተ ጥናት**

|                                                                                                                                                                                                                                                                                                                                                                                                                                                                                                                                                                                                                                                                                                                                        |                             |
|----------------------------------------------------------------------------------------------------------------------------------------------------------------------------------------------------------------------------------------------------------------------------------------------------------------------------------------------------------------------------------------------------------------------------------------------------------------------------------------------------------------------------------------------------------------------------------------------------------------------------------------------------------------------------------------------------------------------------------------|-----------------------------|
| <b>መግቢያ እና በማወቅ የሚሰጥ የስምምነት ቅጽ</b>                                                                                                                                                                                                                                                                                                                                                                                                                                                                                                                                                                                                                                                                                                     |                             |
| <p>“ጤና ይስጥልኝ አቶ/ወሮ _____ እባላለሁ VSO ከሚባል ድርጅት ጋር ነው የምሰራው። በጉራጌ ዞን አሁን ነፍሰጡር የሆኑ እና ባለፉት ሶስት አመታት የወለዱ እናቶችን የሚያካትት ጥናት እያደረግን ነው። የጥናቱ አላማ በዞኑ ያለውን የእናቶችን ጤና እና የነፈሰጡር እናቶች ማረፊያ ቤትን አጠቃቀም በበለጠ ለመረዳት ነው። እርሶ በጥናቱ ላይ እንዲሳተፉ የተመረጡ በመሆኑ እርስዎ የሚሰጡን መረጃ ቡታጅራ ሆስፒታል ለሚሰጠው የእናቶች ጤና አገልግሎት መሻሻል ትልቅ አስተዋጽኦ ያደርጋል። ፈቃደኛ ከሆኑ ጥያቄዎቹን ለመመለስ ..... ደቂቃ ያክል ይወስዳለ የሚሰጡንን መረጃ በሚሰጥር እንደምንይዝ ቃል እየገባንልዎት መመለስ የማይፈልጉት ጥያቄ ካለ አለመመለስ ይችላሉ ወደ ሚቀጥለው ጥያቄ እንሄዳለን።</p> <p>ጥያቄ አለዎት?</p> <p>ጥያቄ ከሌለዎት መጠይቁን መጀመር እንችላለን?</p> <p><b>መጠይቁን ለመጀመር አሁን ነፈሰጡ መሆንዎን ወይም ባለፉት ሶስት አመት መውለድዎን ማወቅ አለብን። አዎ አሁን ነፈሰጡ ነኝ.....አዎ ባለፉት ሶስት አመታት ወልጃለሁ.....: መጠይቁን ቀጥይ/ል። አይደለሁም ከሆነ “ይቅርታ በጥናቱ ላይ መሳተፍ የሚችሉት አሁን ነፈሰጡር የሆኑ ወይም ባለፉት ሶስት አመታት ውስጥ የወለዱ ናቸው”</b></p> |                             |
| የተጠያቂዎ ስም:                                                                                                                                                                                                                                                                                                                                                                                                                                                                                                                                                                                                                                                                                                                             |                             |
| የቤተሰቡ ሃላፊ ስም :                                                                                                                                                                                                                                                                                                                                                                                                                                                                                                                                                                                                                                                                                                                         |                             |
| የጠያቂው ፊርማ:                                                                                                                                                                                                                                                                                                                                                                                                                                                                                                                                                                                                                                                                                                                             | ቀን:                         |
| ተጠያቂዎ ከተስማማች -> ወደ ጥያቄ ቁጥር አንድ ሂድ                                                                                                                                                                                                                                                                                                                                                                                                                                                                                                                                                                                                                                                                                                      | ተጠያቂዎ ካልተስማማች -> መጠይቁን አቆርጥ |

**የእናቶችን ጤና እና የነፈሰጡር እናቶች ማረፊያ ቤትን የተመለከተ ጥናት**

| 1 - የጠያቂው ጉብኝት |                     |                                                   |                                |    |
|----------------|---------------------|---------------------------------------------------|--------------------------------|----|
| Nr             | Variable            | Questions & filters                               | Coding categories              |    |
| 1.             | Cluster             | የተጠያቂው ቦታ<br><br>(በጠያቂው የሚሞላ)                     | የነፍሰጡር እናቶች ማረፊያ ቤት አጣጥ ሆ/ታ    | 1  |
|                |                     |                                                   | ደህረ ወሊድ ምኝታ ክፍል አጣጥ ሆ/ታ        | 2  |
|                |                     |                                                   | የእናቶች እና ህፃናት ጤና አ/ገት አጣጥ ሆ/ታ  | 3  |
|                |                     |                                                   | ቅድመ ወሊድ ክትትል ክፍል አጣጥ ሆ/ታ       | 4  |
|                |                     |                                                   | ደህረ ወሊድ ምኝታ ክፍል ቡታጅራ ሆ/ታ       | 5  |
|                |                     |                                                   | የእናቶች እና ህፃናት ጤና አ/ገት ቡታጅራ ሆ/ታ | 6  |
|                |                     |                                                   | ቅድመ ወሊድ ክትትል ክፍል ቡታጅራ ሆ/ታ      | 7  |
|                |                     |                                                   | የሕብረተሰቡ መኖሪያ አካባቢ              | 8  |
|                |                     |                                                   | ሌላ አካባቢ : ግለፅ                  | 99 |
| 2.             | Datacollector ID    | የጠያቂው ስም<br>(በጠያቂው የሚሞላ)                          |                                |    |
| 3.             | Language interview  | የመጠይቁ ቋንቋ<br>(በጠያቂው የሚሞላ)                         | አማርኛ                           | 1  |
|                |                     |                                                   | ሌላ: ግለፅ                        | 99 |
| 4.             | Language respondent | የመላሽዋ ቋንቋ                                         | አማርኛ                           | 1  |
|                |                     |                                                   | ሌላ: ግለፅ                        | 99 |
| 5.             |                     | Supervisor<br>(በጠያቂው የሚሞላ)                        |                                |    |
| 6.             |                     | Office editor<br>TO BE FILLED IN BY OFFICE EDITOR |                                |    |

| 2 - IDENTIFICATION |                  |                                                                 |                   |    |
|--------------------|------------------|-----------------------------------------------------------------|-------------------|----|
| Nr                 | Variable         | Questions & filters                                             | Coding categories |    |
| 7.                 | Household number | የቤት ቁጥር                                                         |                   |    |
| 8.                 | Household head   | የቤተሰቡ ሃላፊ                                                       | ወንድ               | 1  |
|                    |                  |                                                                 | ሴት                | 2  |
| 9.                 | Locality         | የአካባቢው መጠሪያ                                                     |                   |    |
| 10.                | Woreda           | ወረዳ                                                             | ቡታጅራ ከተማ አስተዳደር   | 1  |
|                    |                  |                                                                 | መስቃን              | 2  |
|                    |                  |                                                                 | ማረቆ               | 3  |
|                    |                  |                                                                 | ሶዶ                | 4  |
|                    |                  |                                                                 | ሌላ አካባቢ : ግለፅ     | 99 |
| 11.                | Region           | በጠያቂው/ዋ የሚሞላ:<br>ከተማ/ገጠር<br>ከተማ:ቡታጅራ ከተማ አስተዳደር<br>ገጠር: ሌላ አካባቢ | ከተማ               | 1  |
|                    |                  |                                                                 | ገጠር               | 2  |
| 12.                |                  | TO BE FILLED IN BY OFFICE EDITOR: SURVEY NUMBER                 |                   |    |

| 3 - መሠረታዊ መርጃ እና ስራ                                    |                       |                                                                      |                   |    |      |
|--------------------------------------------------------|-----------------------|----------------------------------------------------------------------|-------------------|----|------|
| አስረጅ፣ ጥያቄዎችን እመጀምረው አንዳንድ መሰረታዊ ነገሮችን ስለሌሎች በመጠየቅ ይሆናል |                       |                                                                      |                   |    |      |
| Nr                                                     | Variable              | Questions & filters                                                  | Coding categories |    | Skip |
| 13.                                                    | Age                   | የትውልድ ዘመን/አድሜ?                                                       | አመተ ምህረት          |    |      |
|                                                        |                       |                                                                      | አላውቀውም            | 98 |      |
| 13A.                                                   | Age estimation        | ጥርጣሬ ካለ እባክዎን ይገምቱ፡(ለጠያቂው)                                           | 19 - 24           | 1  |      |
|                                                        |                       |                                                                      | 25 - 29           | 2  |      |
|                                                        |                       |                                                                      | 30 - 34           | 3  |      |
|                                                        |                       |                                                                      | 35 - 39           | 4  |      |
|                                                        |                       |                                                                      | 40 - 44           | 5  |      |
|                                                        |                       |                                                                      | 45 - 49           | 6  |      |
| 14.                                                    | Marital status        | የትዳር ሁኔታ ?<br><br>ያገቡ ሆነው አብረው እየኖሩ ካልሆነ ወይም ከአንድ በላይ ጋብቻ እባክዎን ይግለጹ | ያላገባ              | 1  | 16   |
|                                                        |                       |                                                                      | አብሮ የሚኖር ያልተጋባ    | 2  | 16   |
|                                                        |                       |                                                                      | ያገባ               | 3  |      |
|                                                        |                       |                                                                      | • አብሮ የማይኖር       | 3a |      |
|                                                        |                       |                                                                      | • ከአንድ በላይ ጋብቻ    | 3b |      |
|                                                        |                       |                                                                      | የተፋታ/የተለያዩ        | 4  |      |
| ባለቤትዎ የሞተባት                                            | 5                     |                                                                      |                   |    |      |
| 15.                                                    | Age at first marriage | የመጀመሪያ ሲያገቡ/ትዳር ስትይዥ እድሜዎት ስንት ነበር?                                  | እድሜ               |    |      |
| 16.                                                    | Religion              | ሃይማኖትዎ ምንድን ነው?                                                      | ኦርቶዶክስ            | 1  |      |
|                                                        |                       |                                                                      | ካቶሊክ              | 2  |      |
|                                                        |                       |                                                                      | ፕሮቴስታንት           | 3  |      |
|                                                        |                       |                                                                      | ሙስሊም              | 4  |      |
|                                                        |                       |                                                                      | ባህላዊ ሃይማኖት        | 5  |      |
|                                                        |                       |                                                                      | ሌላ : ግለፅ          | 99 |      |
| 17.                                                    | Ethnicity             | ብሔርዎ ምንድን ነው?                                                        | ሰባት ቤት ጉራጌ        | 1  |      |
|                                                        |                       |                                                                      | ስልጢ               | 2  |      |
|                                                        |                       |                                                                      | ሶዶ ጉራጌ            | 3  |      |
|                                                        |                       |                                                                      | ማረቆ/ሊቢያ           | 4  |      |
|                                                        |                       |                                                                      | ቀቤና               | 5  |      |
|                                                        |                       |                                                                      | አማራ               | 6  |      |
|                                                        |                       |                                                                      | ሌላ : ግለፅ          | 99 |      |
| 18.                                                    | School attendance     | ትምህርት ተምረዋል?                                                         | ተምረያለሁ            | 1  |      |
|                                                        |                       |                                                                      | አልተማርኩም           | 2  | 20   |
| 19.                                                    | Educational level     | የትምህርት ደረጃ?                                                          | የመጀመሪያ ደረጃ        | 1  | 20   |
|                                                        |                       |                                                                      | ሁለተኛ ደረጃ          | 2  | 21   |
|                                                        |                       |                                                                      | ቴክኒክና ሙያ          | 3  | 21   |
|                                                        |                       |                                                                      | ከፍተኛ ደረጃ ትምህርት    | 4  | 21   |

| Nr  | Variable                  | Questions & filters                                                                                                                                                                                                      | Coding categories                  | Skip |    |
|-----|---------------------------|--------------------------------------------------------------------------------------------------------------------------------------------------------------------------------------------------------------------------|------------------------------------|------|----|
| 20. | Literacy                  | <p>እባክዎን ቀጣዩን አረፍተ ነገር ያንቡልኝ</p> <p>አረፍተ ነገሩን ያሳዩ።</p> <p>መላሽዎ መሰውን አረፍተ ነገር ማንበብ ካልቻሉ ፤ ከአረፍተ ነገሩ ውስጥ ሊያነቡት የሚችሉት ቃል ካለ ይጠይቁቸው?</p> <p><b>ታሞ ከገጠማቸው ሕጻናት ለመጠንቀቅ</b></p>                                                 | ማንበብ አይችሉም                         | 1    |    |
|     |                           |                                                                                                                                                                                                                          | የተወሰነ ቃላት ያነባሉ                     | 2    |    |
|     |                           |                                                                                                                                                                                                                          | ሙሉ አ/ነገር ማንበብ ይችላሉ                 | 3    |    |
|     |                           |                                                                                                                                                                                                                          | ከአማራጭ ቋንቋ ውጭ ማንበብ ይችላሉ ቋንቋውን ግለጽ : | 4    |    |
|     |                           |                                                                                                                                                                                                                          | ማየት የተሳናት/ቸው                       | 5    |    |
| 21. | Exposure mass media radio | ፊደላዊ ምን ያክል ይከታተላሉ?                                                                                                                                                                                                      | በሳምንት አንድ ጊዜ እና ከዚያ በላይ            | 1    |    |
|     |                           |                                                                                                                                                                                                                          | በሳምንት አንድ ጊዜ እና ከዚያ በታች            | 2    |    |
|     |                           |                                                                                                                                                                                                                          | አልከታተልም                            | 3    |    |
| 22. | Exposure mass media tv    | ቴሌቪዥን ምን ያክል ይከታተላሉ?                                                                                                                                                                                                     | በሳምንት አንድ ጊዜ እና ከዚያ በላይ            | 1    |    |
|     |                           |                                                                                                                                                                                                                          | በሳምንት አንድ ጊዜ እና ከዚያ በታች            | 2    |    |
|     |                           |                                                                                                                                                                                                                          | አልከታተልም                            | 3    |    |
| 23. | Woman's employment status | <p>ባለፉት 12 ወራት ውስጥ ከቤት ስራ በተጨማሪ ሌላ ስራ ሰርተሻል/ዋል?</p> <p>አስፈላጊ ከሆነ አስረዳ/ጅ :</p> <p>አንዳንድ እናቶች ለምሳሌ ንግድ፣ የቤተሰቡ እርሻ ላይ መስራት፣ የገሮ አትክልት መሸጥ፣ የቀን ስራ መስራት እና የመሳሰሉትን አይነት ስራ ከቤት ስራ በተጨማሪ ይሰራሉ። አረስዎስ እንደዚህ አይነት ስራ ሰርተሻል?</p> | አዎ                                 | 1    |    |
|     |                           |                                                                                                                                                                                                                          | አልሰራሁም                             | 2    | 25 |
| 24. | Woman's occupation        | <p>ስራዎት ምንድን ነው፤</p> <p>ለዚህ ጥያቄ መልስ የቤት እመቤት ከሆነ የጥያቄ 23 መልስ አልሰራሁም መሆን አለበት</p>                                                                                                                                         | ነጋዴ                                | 1    |    |
|     |                           |                                                                                                                                                                                                                          | አርሶ አደር/ገበሬ                        | 2    |    |
|     |                           |                                                                                                                                                                                                                          | የቤት ሰራተኛ                           | 3    |    |
|     |                           |                                                                                                                                                                                                                          | ፀሀፊ                                | 4    |    |
|     |                           |                                                                                                                                                                                                                          | ሌላ፣ ግለፅ                            | 99   |    |

| 4 -የባል መሰረታዊ መረጃ                                           |                             |                                |                   |      |    |
|------------------------------------------------------------|-----------------------------|--------------------------------|-------------------|------|----|
| ለጥያቄ ቁጥር 14 የሰጡት መልስ 1 ከሆነ ቀጣዮቹን ጥያቄዎች በመዘለል ወደ ክፍል 6 ይቀጥሉ |                             |                                |                   |      |    |
| አስረዳ: ከዚህ በመቀጠል ስለ ትዳር አጋር/ባለቤትዎ ነው የምጠይቀዎት።               |                             |                                |                   |      |    |
| Nr                                                         | Variable                    | Questions & filters            | Coding categories | Skip |    |
| 25.                                                        | Partner's educational level | ባለቤትዎ/የትዳር አጋርዎ ትምህርት ተከታትለዋል? | አዎ                | 1    |    |
|                                                            |                             |                                | አልተከታተለም          | 2    | 27 |
| 26.                                                        | Partner's educational level | የባለቤትዎ/የትዳር አጋርዎ የትምህርት ደረጃ?   | የመጀመሪያ ደረጃ        | 1    |    |
|                                                            |                             |                                | ሁለተኛ ደረጃ          | 2    |    |
|                                                            |                             |                                | ቴክኒክና ሙያ          | 3    |    |
|                                                            |                             |                                | ከፍተኛ ደረጃ ትምህርት    | 4    |    |
| 27.                                                        | Partner's employment status | የባለቤትዎ/የትዳር አጋርዎ ስራ ምንድን ነው?   | ነጋዴ               | 1    |    |
|                                                            |                             |                                | አርሶ አደር/ገበሬ       | 2    |    |
|                                                            |                             |                                | ሹፊ                | 3    |    |
|                                                            |                             |                                | የመንግስት ሰራተኛ       | 4    |    |
|                                                            |                             |                                | ስራ የሌለው           | 5    |    |
|                                                            |                             |                                | ሌላ ግለፅ            | 99   |    |

| 5 - የቤት ውስጥ ስራን እና ውሳኔዎችን በመወሰን ዙሪያ |                           |                                                                                                      |                   |    |      |
|-------------------------------------|---------------------------|------------------------------------------------------------------------------------------------------|-------------------|----|------|
| Nr                                  | Variable                  | Questions & filters                                                                                  | Coding categories |    | Skip |
| 28.                                 | Decision-making earnings  | ማን ነው በበላይነት የቤተሰቡ ገቢ ላይ የሚወስነው?                                                                     | እኔ                | 1  |      |
|                                     |                           |                                                                                                      | ባል/የትዳር አጋር       | 2  |      |
|                                     |                           |                                                                                                      | በጋራ               | 3  |      |
|                                     |                           |                                                                                                      | ገቢ የለም            | 4  |      |
|                                     |                           |                                                                                                      | ሌላ ሰው፣ ግለፅ        | 99 |      |
| 29.                                 | Division household chores | ባለቤትዎ የቤት ውስጥ ስራን ያግዟታል ለምሳሌ ልጆችን በመንከባከብ፣ ምግብ በማብሰል፣ ቤት በማዕዳት እና የመሳሰሉትን..                          | ያግዘኛል             | 1  |      |
|                                     |                           |                                                                                                      | አያግዘኝም            | 2  |      |
| 30.                                 | Presence others           | በአሁኑ ሰዓት ሌላ ሰው በአካባቢ መኖሩን ያረጋግጡ<br>1. ሌላ ሰው አለ እያዳመጡን ነው<br>2. ሌላ ሰው አለ እያዳመጡን አይደለም<br>3. ሌላ ሰው የለም | ልጆች < 10አመት       | 1  |      |
|                                     |                           |                                                                                                      |                   | 2  |      |
|                                     |                           |                                                                                                      |                   | 3  |      |
|                                     |                           |                                                                                                      | ባል                | 1  |      |
|                                     |                           |                                                                                                      |                   | 2  |      |
|                                     |                           |                                                                                                      |                   | 3  |      |
|                                     |                           |                                                                                                      | ሌላ ወንድ            | 1  |      |
|                                     |                           |                                                                                                      |                   | 2  |      |
|                                     |                           |                                                                                                      |                   | 3  |      |
|                                     |                           |                                                                                                      | ሌላ ሴት             | 1  |      |
|                                     | 2                         |                                                                                                      |                   |    |      |
|                                     | 3                         |                                                                                                      |                   |    |      |
| 31.                                 | Domestic/sexual violence  | በርስዎ አመለካከት ባል ሚስቱን የመቅጣት ወይም የመምታት መብት አለው?                                                         | አዎ                | 1  |      |
|                                     |                           |                                                                                                      | የለውም              | 2  |      |

| 6 - የቤት ውስጥ ሀብት |                           |                                               |                             |     |      |  |
|-----------------|---------------------------|-----------------------------------------------|-----------------------------|-----|------|--|
| Nr              | Variable                  | Questions & filters                           | Coding categories           |     | Skip |  |
| 32.             | Household wealth          | በቤተሰብዎ/በቤትዎ ውስጥ                               |                             |     |      |  |
|                 |                           |                                               | • በቂ ቀለብ/ምግብ                | አለ  | 1    |  |
|                 |                           |                                               |                             | የለም | 2    |  |
|                 |                           |                                               | • ንፁህ የመጠጥ ውሃ አቅርቦት/ቦንቦ ውሃ  | አለ  | 1    |  |
|                 |                           |                                               |                             | የለም | 2    |  |
|                 |                           |                                               | • መብራት                      | አለ  | 1    |  |
|                 |                           |                                               |                             | የለም | 2    |  |
|                 |                           |                                               | • ቴሌቪዥን                     | አለ  | 1    |  |
|                 |                           |                                               |                             | የለም | 2    |  |
|                 |                           |                                               | • ሞባይል                      | አለ  | 1    |  |
|                 |                           |                                               |                             | የለም | 2    |  |
|                 |                           |                                               | • የእርሻ መራት                  | አለ  | 1    |  |
|                 |                           |                                               |                             | የለም | 2    |  |
|                 |                           |                                               | • ከብቶች(ላም፣ በሬ፣ በጎች ወይም ፍየል) | አለ  | 1    |  |
|                 | የለም                       | 2                                             |                             |     |      |  |
| 33.             | Relative household wealth | በሀብት ደረጃ እራስዎን ከአካባቢዎ አንጻር ሲያወዳድሩ እንዴት ይገልፁታል | በጣም ሀብታም                    | 1   |      |  |
|                 |                           |                                               | ሀብታም                        | 2   |      |  |
|                 |                           |                                               | ደሃ                          | 3   |      |  |
|                 |                           |                                               | በጣም ደሃ                      | 4   |      |  |

| 7- ስነ ተዋልዶ እና የወሊድ መቆጣጠር                                                                                           |                                        |                                                                                                                            |                   |    |      |
|--------------------------------------------------------------------------------------------------------------------|----------------------------------------|----------------------------------------------------------------------------------------------------------------------------|-------------------|----|------|
| አሁን ደግሞ እስከአሁን ደረሰ ሰለነበርዎት እርግዝና እና ስለልጆቻዎ እጠይቀዎታለሁ                                                                |                                        |                                                                                                                            |                   |    |      |
| Nr                                                                                                                 | Variable                               | Questions & filters                                                                                                        | Coding categories |    | Skip |
| 34.                                                                                                                | Birth giving                           | ልጅ ወልደዋል?                                                                                                                  | አዎ                | 1  | 36   |
|                                                                                                                    |                                        |                                                                                                                            | አይ                | 2  |      |
| 35.                                                                                                                | Total number of live births            | በሕይወት የተወለዱ ስንት ልጆች አሉዎት?                                                                                                  |                   |    |      |
| 36.                                                                                                                | IUFD                                   | ሕይወት የሌለው ልጅ ወልደው ያውቃሉ?                                                                                                    | አዎ                | 1  | 38   |
|                                                                                                                    |                                        |                                                                                                                            | አይ                | 2  |      |
| 37.                                                                                                                | Total number of IUFD                   | ስንት ጊዜ ነው ይህ የገጠመዎት?                                                                                                       |                   |    |      |
| 38.                                                                                                                | Early Neonatal death                   | በሕይወት ከተወለደ በሃላ በመጀመሪያው ሳምንት የሞተ ልጅስ ነበር?<br><br>ከተወለደ በኋላ ማልቀስ ወይም ሌላ በሕይወት የመኖር ምልክት ካሳየ በኋላ የሞተ ልጅ                      | አዎ                | 1  | 40   |
|                                                                                                                    |                                        |                                                                                                                            | አይ                | 2  |      |
| 39.                                                                                                                | Total number of early neonatal deaths  | ስንት ጊዜ ነው ይህን የገጠመዎት?                                                                                                      |                   |    |      |
| 40.                                                                                                                | Total number of births                 | በአጠቃላይ ስንት ጊዜ ወልደዋል? ምንም ካልወለዱ *00* በማለት ይመዘገቡ<br>በሕይወት ያልተወለዱትንም ያጠቃልላል(35+37)                                            |                   |    |      |
| 41.                                                                                                                | Pregnancy                              | ባሁኑ ሰአት ነፍሰጡ/እርጉዝ ነዎት?                                                                                                     | አዎ                | 1  | 45   |
|                                                                                                                    |                                        |                                                                                                                            | አይደለሁም            | 2  |      |
|                                                                                                                    |                                        |                                                                                                                            | እርግጠኛ አይደለሁም      | 98 |      |
| <b>የጥያቄ 40 መልስ "ኬሮ" ሆኖ የጥያቄ 41 መልስ "አይደለሁም" ወይም እርግጠኛ አይደለሁም ከሆነ ተጠያቂዎን ደግመው በመጠየቅ ያረጋግጡና ለውጥ ከሌለ መጠይቁን ያቆርጡ::</b> |                                        |                                                                                                                            |                   |    |      |
| 42.                                                                                                                | Completed months of pregnancy          | እርግዝናው ስንት ወር ነው?<br>(የጨረሻቸውን ወራት በቻ)                                                                                      | .....ወር           |    |      |
| 42a                                                                                                                | ANC Visits                             | በእርግዝና ወቅት የህክምና ክትትል ስንት ጊዜ አድርገዋል?                                                                                       |                   |    |      |
| 42b                                                                                                                | Place of ANC                           | በእርግዝና ወቅት የህክምና ክትትል ያደረጉት የት ነው?                                                                                         | ጤና ኬላ             | 1  |      |
|                                                                                                                    |                                        |                                                                                                                            | ጤና ጣቢያ            | 2  |      |
|                                                                                                                    |                                        |                                                                                                                            | ሆስፒታል             | 3  |      |
|                                                                                                                    |                                        |                                                                                                                            | ሌላ ግለጽ            | 99 |      |
| 43.                                                                                                                | Knowledge EDD                          | የምትወልድበትን ቀን ታውቁዋለሽ?                                                                                                       | አዎ                | 1  |      |
|                                                                                                                    |                                        |                                                                                                                            | አይ አላውቀውም         | 2  |      |
| 44.                                                                                                                | (Un)wanted/planned/supported pregnancy | እርግዝናው የታቀደበት፣ የተፈለገ እና መንከባከብ የምትችሉት ነው?<br><br>ሁሉንም ምላሾች መዘግቧ                                                            | የታቀደ              | 1  |      |
|                                                                                                                    |                                        |                                                                                                                            | የሚፈለግ             | 2  |      |
|                                                                                                                    |                                        |                                                                                                                            | መንከባከብ የሚቻል       | 3  |      |
|                                                                                                                    |                                        |                                                                                                                            | ከዚያ ውጭ            | 4  |      |
| 45.                                                                                                                | Contraceptive use                      | የወሊድ መቆጣጠሪያ ወይም የቤተሰብ ምጣኔ ዘዴዎችን ተጠቅመው ያውቃሉ?                                                                                | አሁን እየተጠቀሙ ነው     | 1  |      |
|                                                                                                                    |                                        |                                                                                                                            | ከዚህ በፊት ተጠቅመዋል    | 2  |      |
|                                                                                                                    |                                        |                                                                                                                            | ተጠቅመው አያውቁም       | 3  |      |
| 46.                                                                                                                | Decision-making MCH                    | የእርሶዎን እና የልጅዎን ጤንነት በተመለከተ አስዛኛውን ጊዜ ማን ነው የሚወስነው?<br><br>ለምሳሌ እርስዎ ወይም ልጅዎ ቢታመሙ የህክምና እርዳታ ለማግኘት ሆነ ላለማግኘት ማን ነው እሚወስነው? | እኔ                | 1  |      |
|                                                                                                                    |                                        |                                                                                                                            | ባል/የትዳር አጋር       | 2  |      |
|                                                                                                                    |                                        |                                                                                                                            | በጋራ               | 3  |      |
|                                                                                                                    |                                        |                                                                                                                            | ሌላ ሰው፣ ግለሰብ       | 99 |      |

| 7 -ልጆችን የተመለከተ ጥያቄ የቀጠለ.....                                                                                                                                             |                                      |                                 |       |       |       |       |       |       |          |
|--------------------------------------------------------------------------------------------------------------------------------------------------------------------------|--------------------------------------|---------------------------------|-------|-------|-------|-------|-------|-------|----------|
| ሁሉንም እርግዝና ይመዝግቡ (በሕይወት ያልተወለዱትንም ያጠቃልላል)፤ ለመንታ ልጆች እያንዳንዳቸውን ለየብቻ ይመዝግቡ፤ ከ 6 በላይ ልጆች ካሉ ተጨማሪ .                                                                          |                                      |                                 |       |       |       |       |       |       |          |
| Nr                                                                                                                                                                       | Variables                            | Filters                         | 1ኛ ስጅ | 2ኛ ስጅ | 3ኛ ስጅ | 4ኛ ስጅ | 5ኛ ስጅ | 6ኛ ስጅ | Skip     |
| 47.                                                                                                                                                                      | የልጅ ስም                               |                                 |       |       |       |       |       |       |          |
| 48.                                                                                                                                                                      | የትውልድ ዘመን                            |                                 |       |       |       |       |       |       |          |
| 49.                                                                                                                                                                      | በሕይወት አለ                             | አለ                              | 1     | 1     | 1     | 1     | 1     | 1     | 51       |
|                                                                                                                                                                          |                                      | የለም                             | 2     | 2     | 2     | 2     | 2     | 2     |          |
| 50.                                                                                                                                                                      | በሕይወት ከሌለ ሲሞት እድሜው ስንት ነበር?          | እድሜ በደቂቃ/ሰአት/ቀን/ሳምንት/ወራት/አመት    |       |       |       |       |       |       |          |
| 51.                                                                                                                                                                      | በሕይወት ካለ አሁን እድሜው ስንት ነው?            | በጨረሳቸው አመታት ልክ ይመዝግቡ            |       |       |       |       |       |       |          |
| 52.                                                                                                                                                                      | በእርግዝና ወቅት የህክምና ክትትል ስንት ጊዜ አድርገዋል? |                                 |       |       |       |       |       |       |          |
| 53.                                                                                                                                                                      | የት ነው የወለዱት?                         | ቤት                              | 1     | 1     | 1     | 1     | 1     | 1     |          |
|                                                                                                                                                                          |                                      | የጤና ተቋም                         | 2     | 2     | 2     | 2     | 2     | 2     |          |
| ሁሉም ልጆች የተወለዱት ተመሳሳይ ቦታ ከሆነ የሚከተሉትን ጥያቄዎች በቅርብ/መጨረሻ ለወለደችው ልጅ ይጠይቁ የምትወልድበት ቦታ ከተቀየረ(ለምሳሌ ቤት ከመውለድ ወደ ጤና ተቋም/ከጤና ተቋም ወደ ቤት መውለድ) ቀጣዮቹን ጥያቄዎች ለነዚህ ለውጥ ለተደረገባቸው ልጆች ይጠይቁ። |                                      |                                 |       |       |       |       |       |       | 54<br>55 |
| 54.                                                                                                                                                                      | ጤና ተቋም ለምን ወለድሽ? ሁሉንም ምክንያቶች የመዝግቡ   | ምቹ ሰለሆነ                         | 1     | 1     | 1     | 1     | 1     | 1     | 57       |
|                                                                                                                                                                          |                                      | የግል ነግነት ሰለሚሰማኝ                 | 2     | 2     | 2     | 2     | 2     | 2     |          |
|                                                                                                                                                                          |                                      | ከዚህ ቀደም የነበረው እርግዝና ላይ ችግር ሰለነበ | 3     | 3     | 3     | 3     | 3     | 3     |          |
|                                                                                                                                                                          |                                      | በምጥ ወቅት ችግር ሰለነበር               | 4     | 4     | 4     | 4     | 4     | 4     |          |
|                                                                                                                                                                          |                                      | ባል ወይም ቤተሰብ ስለወሰነ               | 5     | 5     | 5     | 5     | 5     | 5     |          |
|                                                                                                                                                                          |                                      | ወጭ ሰለሌለው                        | 6     | 6     | 6     | 6     | 6     | 6     |          |
|                                                                                                                                                                          |                                      | ሌላ ግለፅ                          | 99    | 99    | 99    | 99    | 99    | 99    |          |

|     | Variables                                              | Filters                                             | 1ኛ ስጅ | 2ኛ ስጅ | 3ኛ ስጅ | 4ኛ ስጅ | 5ኛ ስጅ | 6ኛ ስጅ | Skip |  |
|-----|--------------------------------------------------------|-----------------------------------------------------|-------|-------|-------|-------|-------|-------|------|--|
| 55. | ቤት ከሆነ የወለዱት ለምን ቤት ወለዱ? ሁሉንም ምክንያቶች የመዝገቡ             | ምቹ ስለሆነ                                             | 1     | 1     | 1     | 1     | 1     | 1     |      |  |
|     |                                                        | የግል ነገነት ስለሚሰማኝ                                     | 2     | 2     | 2     | 2     | 2     | 2     |      |  |
|     |                                                        | ቤት ውስጥ ባህላዊ ነገሮች ስለሚደረጉላችኋል....                     | 3     | 3     | 3     | 3     | 3     | 3     |      |  |
|     |                                                        | ባል ወይም ቤተሰብ ስለወሰኑ                                   | 4     | 4     | 4     | 4     | 4     | 4     |      |  |
|     |                                                        | ችግር ስላልነበር                                          | 5     | 5     | 5     | 5     | 5     | 5     |      |  |
|     |                                                        | ወጭ ስለሌለው                                            | 6     | 6     | 6     | 6     | 6     | 6     |      |  |
|     |                                                        | ሌላ ግለፅ                                              | 99    | 99    | 99    | 99    | 99    | 99    |      |  |
| 56. | ቤት ከሆነ የወለዱት ለምን ነበር በጤና ተቋም ያልወሰዱበ? ሁሉንም ምክንያቶች የመዝገቡ | ክፍያው ብዙ ስለሆነ                                        | A     | A     | A     | A     | A     | A     |      |  |
|     |                                                        | ብዙ ጊዜ የጤና ተቋሙ ዝግ ስለሚሆን/ወደ ሌላ ጤና ተቋም ሪፈረ የመባል እድል ስላ | B     | B     | B     | B     | B     | B     | B    |  |
|     |                                                        | ጤና ተቋሙ ሩቅ ስለሆነ እና ትራንስፖርት ስለሌለ                      | C     | C     | C     | C     | C     | C     | C    |  |
|     |                                                        | በጤና ተቋሙ ስለማልተማመን                                    | D1    | D1    | D1    | D1    | D1    | D1    | D1   |  |
|     |                                                        | አገልግሎቱ ጥሩ ስላልሆነ                                     | D2    | D2    | D2    | D2    | D2    | D2    | D2   |  |
|     |                                                        | አገልግሎቱን የሚሰጡ ሴቶች ስላልሆኑ                              | E     | E     | E     | E     | E     | E     | E    |  |
|     |                                                        | ባል ወይም ቤተሰብ ፈቃደኛ ስላልሆኑ                              | F     | F     | F     | F     | F     | F     | F    |  |
|     |                                                        | የቤተሰቡ አባላት ፈቃደኛ ስላልሆኑ                               | G     | G     | G     | G     | G     | G     | G    |  |
|     |                                                        | የግል ነገነት ስለሌለው                                      | H     | H     | H     | H     | H     | H     | H    |  |
|     |                                                        | No cultural rituals                                 | I     | I     | I     | I     | I     | I     | I    |  |
|     |                                                        | ችግር ስላልነበር                                          | J     | J     | J     | J     | J     | J     | J    |  |
|     |                                                        | አፕሪክሽን በመፍራት                                        | K     | K     | K     | K     | K     | K     | K    |  |
|     |                                                        | ሌላ ግለፅ                                              | 99    | 99    | 99    | 99    | 99    | 99    | 99   |  |
| 57. | በምን መንገድ ነው የወለድሽው                                     | በማሕፀን                                               | 1     | 1     | 1     | 1     | 1     | 1     |      |  |
|     |                                                        | VE                                                  | 2     | 2     | 2     | 2     | 2     | 2     |      |  |
|     |                                                        | በአፕሪክሽን                                             | 3     | 3     | 3     | 3     | 3     | 3     |      |  |
| 58. | ችግር ነበር                                                | አዎ ነበር                                              | 1     | 1     | 1     | 1     | 1     | 1     |      |  |
|     |                                                        | አልነበረም                                              | 2     | 2     | 2     | 2     | 2     | 2     | 63   |  |



|                         | Variables                                    | Filters                        | 1ኛ ስጅ | 2ኛ ስጅ | 3ኛ ስጅ | 4ኛ ስጅ | 5ኛ ስጅ | 6ኛ ስጅ | Skip      |
|-------------------------|----------------------------------------------|--------------------------------|-------|-------|-------|-------|-------|-------|-----------|
| 59.                     | ከነበር ምንድን ነው የተከሰተው ሁሉንም ምክንያቶች የመዝግቡ        | ደም መፍሰስ                        | 1     | 1     | 1     | 1     | 1     | 1     |           |
|                         |                                              | ምጥ መራዘም                        | 2     | 2     | 2     | 2     | 2     | 2     |           |
|                         |                                              | የማህፀን መጥበብ                     | 3     | 3     | 3     | 3     | 3     | 3     |           |
|                         |                                              | ደም ግፊት                         | 4     | 4     | 4     | 4     | 4     | 4     |           |
|                         |                                              | Puerperal infection            | 5     | 5     | 5     | 5     | 5     | 5     |           |
|                         |                                              | በማህፀን ውስጥ የዕንሱ መታፈን            | 6     | 6     | 6     | 6     | 6     | 6     |           |
|                         |                                              | ዕንሱ በማህፀን ውስጥ መሞት              | 7     | 7     | 7     | 7     | 7     | 7     |           |
|                         |                                              | ሌላ ግለፅ                         | 99    | 99    | 99    | 99    | 99    | 99    |           |
| <b>ጤና ተቋም ከሆነ የወለዱት</b> |                                              |                                |       |       |       |       |       |       | <b>63</b> |
| 60.                     | ችግር ከነበር የህክምና እርዳታ ለማግኘት ሞክረዋል              | አዎ                             | 1     | 1     | 1     | 1     | 1     | 1     | <b>61</b> |
|                         |                                              | አይ አልሞክርኩም                     | 2     | 2     | 2     | 2     | 2     | 2     | <b>62</b> |
| 61.                     | የህክምና እርዳታ ለማግኘት ከሞከሩ የት ነው                  | የልምድ አዋላጅ                      | 1     | 1     | 1     | 1     | 1     | 1     | <b>63</b> |
|                         |                                              | የጤና ተቋም                        | 2     | 2     | 2     | 2     | 2     | 2     |           |
|                         |                                              | ሌላ ግለፅ                         | 99    | 99    | 99    | 99    | 99    | 99    |           |
| 62.                     | የህክምና እርዳታ ለማግኘት ካልሞከሩ ለምን ሁሉንም ምክንያቶች የመዝግቡ | ክፍያው ብዙ ስለሆነ                   | A     | A     | A     | A     | A     | A     |           |
|                         |                                              | ብዙ ጊዜ የጤና ተቋም ገዢ ስለሚሆን...      | B     | B     | B     | B     | B     | B     |           |
|                         |                                              | ጤና ተቋሙ ሩቅ ስለሆነ እና ትራንስፖርት ስለሌለ | C     | C     | C     | C     | C     | C     |           |
|                         |                                              | በጤና ተቋሙ ስለማልተማመን               | D1    | D1    | D1    | D1    | D1    | D1    |           |
|                         |                                              | አገልግሎቱ ጥሩ ስላልሆነ                | D2    | D2    | D2    | D2    | D2    | D2    |           |
|                         |                                              | አገልግሎቱን የሚሰጡ ሴቶች ስላልሆኑ         | E     | E     | E     | E     | E     | E     |           |
|                         |                                              | ባል ወይም ቤተሰብ ፈቃደኛ ስላልሆኑ         | F     | F     | F     | F     | F     | F     |           |
|                         |                                              | አስፈላጊ ስላልሆነ                    | G     | G     | G     | G     | G     | G     |           |
|                         |                                              | ሰላምተሰመደ                        | H     | H     | H     | H     | H     | H     |           |
|                         |                                              | ሌላ ግለፅ                         | 99    | 99    | 99    | 99    | 99    | 99    |           |

| 8 - ከእርግዝና ጋር በተያያዘ ሊከሰቱ ስለሚችሉ ችግሮች/አደገኛ ምልክቶች ያለ እውቀት              |                                       |                                                                                                                                                                                                                                                                                                                                                                                                               |                      |    |      |
|---------------------------------------------------------------------|---------------------------------------|---------------------------------------------------------------------------------------------------------------------------------------------------------------------------------------------------------------------------------------------------------------------------------------------------------------------------------------------------------------------------------------------------------------|----------------------|----|------|
| በእርግዝና ወቅት የህክምና ክትትል አድርገው የማያውቁ ከሆነ ወደ ጥያቄ ቁጥር 64 ይቀጥሉ            |                                       |                                                                                                                                                                                                                                                                                                                                                                                                               |                      |    |      |
| Nr                                                                  | Variable                              | Questions & filters                                                                                                                                                                                                                                                                                                                                                                                           | Coding categories    |    | Skip |
| 63.                                                                 | Health education complication s       | በእርግዝና ወቅት የህክምና ክትትል በሚያደርጉበት ጊዜ ከእርግዝና ጋር ተያያዥ ስለሆኑ ችግሮች/ሊከሰቱ ስለሚችሉ አደገኛ ምልክቶች ተነግሮዎታል? ግልፅ ካልሆነ አስረዳ፤ በእርግዝና ወቅት ከእርግዝና ጋር በተያያዘ በአንቺ ወይም በልጅሽ ላይ ሊከሰቱ የሚችሉ የጤና ችግሮች ናቸው።                                                                                                                                                                                                                                  | ተነግሮኛል               | 1  |      |
|                                                                     |                                       |                                                                                                                                                                                                                                                                                                                                                                                                               | አልተነገረኝም             | 2  |      |
| 64.                                                                 | Knowledge pregnancy-complication s    | በእርግዝና ወቅት ሊከሰቱ ከሚችሉ ችግሮች/አደገኛ ምልክቶች ውስጥ የሚያውቁቱን ሊነግሩኝ ይችላሉ?                                                                                                                                                                                                                                                                                                                                                  | ደም መፍሰስ              | A  |      |
|                                                                     |                                       |                                                                                                                                                                                                                                                                                                                                                                                                               | ከማሕፀን ውሃ መፍሰስ        | B  |      |
|                                                                     |                                       |                                                                                                                                                                                                                                                                                                                                                                                                               | ከፍተኛ ራስ ምታት          | C  |      |
|                                                                     |                                       |                                                                                                                                                                                                                                                                                                                                                                                                               | አይን ሸዥ ማለት           | D  |      |
|                                                                     |                                       |                                                                                                                                                                                                                                                                                                                                                                                                               | ትኩሳት                 | E  |      |
|                                                                     |                                       |                                                                                                                                                                                                                                                                                                                                                                                                               | ሆድ ህመም/ጊዜውን ያልጠበቀ ምጥ | F  |      |
|                                                                     |                                       |                                                                                                                                                                                                                                                                                                                                                                                                               | የዕንሱ እንቅስቃሴ መቀነስ     | G  |      |
|                                                                     |                                       |                                                                                                                                                                                                                                                                                                                                                                                                               | ሰውነት ማበጥ             | H  |      |
|                                                                     |                                       |                                                                                                                                                                                                                                                                                                                                                                                                               | ሌላ ግለፅ               | 99 |      |
| ተጠያቂዎ በእርግዝና ወቅት ስለሚከሰቱ ችግሮች የማያውቁ ከሆነ ወደ ቀጣዩ ጥያቄ ከመሄድዎ በፊት ይግለፁላቸው |                                       |                                                                                                                                                                                                                                                                                                                                                                                                               |                      |    |      |
| በእርግዝና ወቅት የህክምና ክትትል አድርገው የማያውቁ ከሆነ ወደ ጥያቄ ቁጥር 66 ይቀጥሉ            |                                       |                                                                                                                                                                                                                                                                                                                                                                                                               |                      |    |      |
| 65.                                                                 | Health education birth preparednes s  | በእርግዝና ወቅት የህክምና ክትትል በሚያደርጉበት ጊዜ ከወሊድ በፊት ማድረግ ስላለብዎት ቅድመ ዝግጅት ተገልጿል ታል ግልፅ ካልሆነ አስረዳ፡፡ከወሊድ በፊት ሊደረግ የሚገባ ቅድመ ዝግጅት ስባል የሚከተሉትን ያካትታል፡፡<br>1. በእርግዝና ወቅት በቅድሚያ የመውለጃ ቦታን መወሰን፡-ቤት ከሆነ የሰለጠነ አዋላጅ/ጤና ተቋም ከሆነ ችግር እንክዋን ቢፈጠር በአፕሬሽን ማዋለድ የሚችል ተቋም ለይቶ ማዘጋጀት<br>2. በምን አይነት መጓጓዣ ወደ ጤና ተቋሙ መሄድ እንዳለብዎ፤ ለትራንስፖርትና ለያጋጥሙ ለሚችሉ የህክምና ወጭዎች ሊከፈል የሚችል ብር መቆጠብ<br>3. ብዙ ደም መፍሰስ ቢያጋጥምዎ ያንን ለመተካት ደም የሚሰግስ ሰው ቀድሞ ማዘጋጀት | ተገልጿልኛል              | 1  |      |
|                                                                     |                                       |                                                                                                                                                                                                                                                                                                                                                                                                               | አልተገልጸልኝም            | 2  |      |
| 66.                                                                 | BP Advance planning place of delivery | በእርግዝናዎ ወቅት ቀድመው የት መውለድ እንዳለብዎት/የመውለጃ ቦታን ወስነሽ ነበር?                                                                                                                                                                                                                                                                                                                                                          | አዎ                   | 1  |      |
|                                                                     |                                       |                                                                                                                                                                                                                                                                                                                                                                                                               | አልወሰንኩም              | 2  | 73   |
| 67.                                                                 | BP planned place of delivery          | የት ለመውለድ ነበር ቀድመው ያቀዱት                                                                                                                                                                                                                                                                                                                                                                                        | ቤት                   | 1  | 68   |
|                                                                     |                                       |                                                                                                                                                                                                                                                                                                                                                                                                               | በጤና ተቋም              | 2  | 69   |
|                                                                     |                                       |                                                                                                                                                                                                                                                                                                                                                                                                               | ሌላ ግለፅ               | 99 |      |
| 68.                                                                 | BP trained BA                         | ቤት ከሆነ በቅድሚያ የሰለጠነ አዋላጅ አዘጋጅተው ነበር                                                                                                                                                                                                                                                                                                                                                                            | አዘጋጅቻ ነበር            | 1  |      |
|                                                                     |                                       |                                                                                                                                                                                                                                                                                                                                                                                                               | አላዘጋጀሁም              | 2  |      |
| 69.                                                                 | BP HF                                 | ችግር እንክዋን ቢፈጠር በአፕሬሽን ማዋለድ የሚችል ተቋም ለይቶ አዘጋጅተው                                                                                                                                                                                                                                                                                                                                                                | አዘጋጅቻ ነበር            | 1  |      |
|                                                                     |                                       |                                                                                                                                                                                                                                                                                                                                                                                                               | አላዘጋጀሁም              | 2  |      |
| 70.                                                                 | BP transport                          | በምን አይነት መጓጓዣ ወደ ጤና ተቋሙ መድረስ እንዳለብዎ ቀድመው አቅደዋል                                                                                                                                                                                                                                                                                                                                                                | አቅጃለሁ                | 1  |      |
|                                                                     |                                       |                                                                                                                                                                                                                                                                                                                                                                                                               | አላቀድኩም               | 2  |      |
| 71.                                                                 | BP money                              | ለያጋጥሙ ለሚችሉ የህክምና ወጭዎች ሊከፈል የሚችል ብር መቆጠብ                                                                                                                                                                                                                                                                                                                                                                       | ቆጥቤያለሁ               | 1  |      |
|                                                                     |                                       |                                                                                                                                                                                                                                                                                                                                                                                                               | አልቆጠብኩም              | 2  |      |
| 72.                                                                 | BP blood donor                        | ደም መሰጠት የሚችል ሰው ቀድመው አዘጋጅተው ነበር                                                                                                                                                                                                                                                                                                                                                                               | አዘጋጅቻ ነበር            | 1  |      |
|                                                                     |                                       |                                                                                                                                                                                                                                                                                                                                                                                                               | አላዘጋጀሁም              | 2  |      |

| 9 - ለጉዳት ተጋላጭነት ያለ ግንዛቤ |                                      |                                               |                   |   |      |
|-------------------------|--------------------------------------|-----------------------------------------------|-------------------|---|------|
| Nr                      | Variable                             | Questions & filters                           | Coding categories |   | Skip |
| 73.                     | Perceived risk home delivery -mother | የት መውለድዎ በበለጠ የእርስዎን ጤና ለጉዳት ያጋልጠኛል ብለው ያስባሉ? | ቤት                | 1 |      |
|                         |                                      |                                               | ጤና ተቋም            | 2 |      |
| 74.                     | Perceived risk home delivery - baby  | የት መውለድዎ በበለጠ የልጅዎን ጤና ለጉዳት ያጋልጠዋል ብለው ያስባሉ?  | ቤት                | 1 |      |
|                         |                                      |                                               | ጤና ተቋም            | 2 |      |

| 10 - የጤና አገልግሎት እና የአካባቢ ሁኔታ                                            |                             |                                                                                               |                   |    |      |
|-------------------------------------------------------------------------|-----------------------------|-----------------------------------------------------------------------------------------------|-------------------|----|------|
| አስረዳ/ጅ: አሁን ደግሞ በአካባቢዎ ሰለሚገኙ የጤና ተቋማት እና እርስዎ ያልዎትን የግልጋሎት ልምድ እጠይቅዎታለሁ |                             |                                                                                               |                   |    |      |
| Nr                                                                      | Variable                    | Questions & filters                                                                           | Coding categories |    | Skip |
| 75.                                                                     | Travel time Health Post     | ከቤትዎት እስከ ጤና ኬላው ድረስ ለመጓዝ ምን ያክል ጊዜ ይፈጃል?<br><br>አጠቃላይ ለመድረስ የሚፈጅውን ጊዜ በደቂቃ እና/ወይም በሰዓት ይመዝግቡ | ደቂቃ               |    |      |
|                                                                         |                             |                                                                                               | ሰዓት               |    |      |
|                                                                         |                             |                                                                                               | ጤና ኬላ የለም         | 98 |      |
| 76.                                                                     | Travel time Health Center   | ከቤትዎት እስከ ጤና ጣቢያ ድረስ ለመጓዝ ምን ያክል ጊዜ ይፈጃል?                                                     | ደቂቃ               |    |      |
|                                                                         |                             |                                                                                               | ሰዓት               |    |      |
|                                                                         |                             |                                                                                               | ጤና ጣቢያ የለም        | 98 |      |
| 77.                                                                     | Travel time Hospital        | ከቤትዎት እስከ ባቅራቢያዎ ወደሚገኝ ሆስፒታል ለመጓዝ ምን ያክል ጊዜ ይፈጃል?                                             | ደቂቃ               |    |      |
|                                                                         |                             |                                                                                               | ሰዓት               |    |      |
| 78.                                                                     | Emergency transport         | ምጥ ቤት ከጀመረ በሆላ ጤና ተቋም ለመድረስ ትራንስፖርት ማግኘት ምን ያክ ከባድ ወይም ቀላል ነው                                 | በጣም ቀላል           | 1  |      |
|                                                                         |                             |                                                                                               | ቀላል               | 2  |      |
|                                                                         |                             |                                                                                               | ከባድ               | 3  |      |
|                                                                         |                             |                                                                                               | በጣም ከባድ           | 4  |      |
| 79.                                                                     | Emergency mode of transport | ቤት በሚወልዱበት ወቅት ችግር ቢፈጠር ጤና ተቋም ለመድረስ አብዛኛውን መንገድ በምን ይጓዛሉ                                     | በእግር ሰው ተሽክሞኝ     | 1  |      |
|                                                                         |                             |                                                                                               | በፈረስ              | 2  |      |
|                                                                         |                             |                                                                                               | በህዝብ ትራንስፖርት      | 3  |      |
|                                                                         |                             |                                                                                               | በግል ትራንስፖርት       | 4  |      |

| 11 - ለእናቶችና ለሕፃናት የሚሰጥ የጤና አገልግሎት ጥራት |                                               |                                                                                                                                                                                                                                      |                   |    |      |
|---------------------------------------|-----------------------------------------------|--------------------------------------------------------------------------------------------------------------------------------------------------------------------------------------------------------------------------------------|-------------------|----|------|
| Nr                                    | Variable                                      | Questions & filters                                                                                                                                                                                                                  | Coding categories |    | Skip |
| 80.                                   | Nearest hospital                              | ለመኖሪያ ቤትዎ የሚቀርበው ሆስፒታል የቱ ነው?                                                                                                                                                                                                        | አጣጥ ሆስፒታል         | A  |      |
|                                       |                                               |                                                                                                                                                                                                                                      | ቡታጅራ ሆስፒታል        | B  |      |
|                                       |                                               |                                                                                                                                                                                                                                      | መርሲ ሆስፒታል         | M  |      |
|                                       |                                               |                                                                                                                                                                                                                                      | ሌላ ግለፅ            | 99 |      |
| 81.                                   | Utilization hospital                          | በዚህ ሆስፒታል ተጠቅመው ያውቃሉ?                                                                                                                                                                                                                | አዎ                | 1  |      |
|                                       |                                               |                                                                                                                                                                                                                                      | አላውቅም             | 2  | 84   |
| 82.                                   | Utilization MCH at hospital                   | የእናቶችና የሕፃናት ጤና አገልግሎት በዚህ ሆስፒታል ተጠቅመው ያውቃሉ ?                                                                                                                                                                                        | አዎ                | 1  |      |
|                                       |                                               |                                                                                                                                                                                                                                      | አላውቅም             | 2  | 84   |
| 83.                                   | Utilization types of MCH services at hospital | የትኛውን የእናቶችና የሕፃናት ጤና አገልግሎት ነው የተጠቀሙት?<br>የቅድመወለድ ክትትል፣ በርግዝና ወቅት የሚደረግ የህክምና አገልግሎት<br>አልትራሳውንድ፣ የፀገሉን አቀማመጥ፣ እድገት በቴሌቪዥን ማየት<br>የማዋለድ አገልግሎት፣ በሰለጠኑ ባለሙያዎች ማዋለድ ድህረ ወሊድ አገልግሎት፣ ከወለድሽ በሆላ ለልጅ እና ለእናት የሚሰጥ የህክምና አገልግሎት ሁሉን ይመዝግቡ | የቅድመ ወሊድ ክትትል     | A  | 85   |
|                                       |                                               |                                                                                                                                                                                                                                      | አልትራሳውንድ          | B  |      |
|                                       |                                               |                                                                                                                                                                                                                                      | የማዋለድ አገልግሎት      | C  |      |
|                                       |                                               |                                                                                                                                                                                                                                      | ድህረ ወሊድ አገልግሎት    | D  |      |

| Nr                                                                                | Variable                                                     | Questions & filters                                                                       | Coding categories              |    | Skip |
|-----------------------------------------------------------------------------------|--------------------------------------------------------------|-------------------------------------------------------------------------------------------|--------------------------------|----|------|
| 84.                                                                               | Reasons for non-utilization (MCH at hospital)                | <p>ከላይ የተጠቀሱትን አገልግሎቶች በሆስፒታሉ ተጠቅመው የሚያውቁ ከሆነ ምክንያቱን ምንድን ነው?</p> <p>ሁሉን ምክንያቶች ይመዘግቡ</p> | ክፍያው ብዙ ስለሆነ                   | A  | 97   |
|                                                                                   |                                                              |                                                                                           | ብዙ ጊዜ የጤና ተቋሙ ዝግ ስለሚሆን...      | B  |      |
|                                                                                   |                                                              |                                                                                           | ጤና ተቋሙ ሩቅ ስለሆነ እና ትራንስፖርት ስለሌለ | C  |      |
|                                                                                   |                                                              |                                                                                           | በጤና ተቋሙ ስለማልተማመን               | D1 |      |
|                                                                                   |                                                              |                                                                                           | አገልግሎቱ ጥሩ ስላልሆነ                | D2 |      |
|                                                                                   |                                                              |                                                                                           | አገልግሎቱን የሚሰጡ ሴቶች ስላልሆኑ         | E  |      |
|                                                                                   |                                                              |                                                                                           | ባል ወይም ቤተሰብ ፈቃደኛ ስላልሆኑ         | F  |      |
|                                                                                   |                                                              |                                                                                           | አስፈላጊ ስላልሆነ                    | G  |      |
|                                                                                   |                                                              |                                                                                           | ሰላልተለመደ                        | H  |      |
|                                                                                   |                                                              |                                                                                           | ሌላ ግለፅ                         | 99 |      |
| <p>ከላይ የተጠቀሱትን አገልግሎቶች በሆስፒታሉ ተጠቅመው የሚያውቁ ከሆነ ከሚከተሉት ነገሮች አንጻር ጥራቱን እንዴት ያዩታል</p> |                                                              |                                                                                           |                                |    |      |
| 85.                                                                               | Perceived quality of care MCH hospital - overall             | <ul style="list-style-type: none"> <li>• አጠቃላይ አገልግሎት</li> </ul>                          | ጥሩ                             | 4  |      |
|                                                                                   |                                                              |                                                                                           | አጥጋቢ                           | 3  |      |
|                                                                                   |                                                              |                                                                                           | በቂ                             | 2  |      |
|                                                                                   |                                                              |                                                                                           | ዝቅተኛ                           | 1  |      |
| 86.                                                                               | Perceived quality of care MCH hospital - supplies            | <ul style="list-style-type: none"> <li>• የመድሃኒትና የሕክምና ቁሳቁስ አቅራቢ</li> </ul>               | ጥሩ                             | 4  |      |
|                                                                                   |                                                              |                                                                                           | አጥጋቢ                           | 3  |      |
|                                                                                   |                                                              |                                                                                           | በቂ                             | 2  |      |
|                                                                                   |                                                              |                                                                                           | ዝቅተኛ                           | 1  |      |
| 87.                                                                               | Perceived quality of care MCH hospital – waiting times       | <ul style="list-style-type: none"> <li>• አገልግሎት ለማግኘት የሚጠበቁት ሰዓት</li> </ul>               | ጥሩ                             | 4  |      |
|                                                                                   |                                                              |                                                                                           | አጥጋቢ                           | 3  |      |
|                                                                                   |                                                              |                                                                                           | በቂ                             | 2  |      |
|                                                                                   |                                                              |                                                                                           | ዝቅተኛ                           | 1  |      |
| 88.                                                                               | Perceived quality of care MCH hospital – quality staff       | <ul style="list-style-type: none"> <li>• የሰራተኞች የሙያ ብቃት</li> </ul>                        | ጥሩ                             | 4  |      |
|                                                                                   |                                                              |                                                                                           | አጥጋቢ                           | 3  |      |
|                                                                                   |                                                              |                                                                                           | በቂ                             | 2  |      |
|                                                                                   |                                                              |                                                                                           | ዝቅተኛ                           | 1  |      |
| 89.                                                                               | Perceived quality of care MCH hospital – friendliness staff  | <ul style="list-style-type: none"> <li>• የሰራተኞች ቀረቤታ</li> </ul>                           | ጥሩ                             | 4  |      |
|                                                                                   |                                                              |                                                                                           | አጥጋቢ                           | 3  |      |
|                                                                                   |                                                              |                                                                                           | በቂ                             | 2  |      |
|                                                                                   |                                                              |                                                                                           | ዝቅተኛ                           | 1  |      |
| 90.                                                                               | Perceived quality of care MCH hospital – respect preferences | <ul style="list-style-type: none"> <li>• ለተገለገይ ያላቸው አክብሮት</li> </ul>                     | ጥሩ                             | 4  |      |
|                                                                                   |                                                              |                                                                                           | አጥጋቢ                           | 3  |      |
|                                                                                   |                                                              |                                                                                           | በቂ                             | 2  |      |
|                                                                                   |                                                              |                                                                                           | ዝቅተኛ                           | 1  |      |
| 91.                                                                               | Perceived quality of care MCH hospital – privacy             | <ul style="list-style-type: none"> <li>• የግል ነፃነት</li> </ul>                              | ጥሩ                             | 4  |      |
|                                                                                   |                                                              |                                                                                           | አጥጋቢ                           | 3  |      |
|                                                                                   |                                                              |                                                                                           | በቂ                             | 2  |      |
|                                                                                   |                                                              |                                                                                           | ዝቅተኛ                           | 1  |      |
| 92.                                                                               | Perceived quality of care MCH hospital - hygiene             | <ul style="list-style-type: none"> <li>• ንፅህና</li> </ul>                                  | ጥሩ                             | 4  |      |
|                                                                                   |                                                              |                                                                                           | አጥጋቢ                           | 3  |      |
|                                                                                   |                                                              |                                                                                           | በቂ                             | 2  |      |
|                                                                                   |                                                              |                                                                                           | ዝቅተኛ                           | 1  |      |

| Nr  | Variable                                                | Questions & filters                                                                                                                                                                   | Coding categories | Skip |  |
|-----|---------------------------------------------------------|---------------------------------------------------------------------------------------------------------------------------------------------------------------------------------------|-------------------|------|--|
| 93. | Perceived quality of care MCH hospital - language       | <ul style="list-style-type: none"> <li>በራስ ቋንቋ መጠቀም ይቻላል</li> </ul>                                                                                                                   | ይቻላል              | 1    |  |
|     |                                                         |                                                                                                                                                                                       | አይቻልም             | 2    |  |
| 94. | Perceived quality of care MCH hospital - discrimination | <ul style="list-style-type: none"> <li>አንዳንድ ተገልጋዮች ይግለጻሉ ወይ</li> </ul> <p>አስረዳ/ጅ : አንድ አንድ ጊዜ አንድ አንድ ሰዎች በዘር፣ በኑሮቸው ደረጃ ወይም ባላቸው ህመም ምክንያት(HIV) በሌሎች ሰዎች ዘንድ መገለል ሊደርስባቸው ይችላል.</p> | አዎ                | 1    |  |
|     |                                                         |                                                                                                                                                                                       | አይገለጹም            | 2    |  |
| 95. | Perceived quality of care MCH hospital - cost           | <ul style="list-style-type: none"> <li>ክፍያ</li> </ul>                                                                                                                                 | ተመጣጣኝ             | 1    |  |
|     |                                                         |                                                                                                                                                                                       | የልተመጣጠነ           | 2    |  |
| 96. | Recommendation MCH Hospital                             | ለሌሎች ነፍሰጡር እናቶች አገልግሎቱን እንዲያገኙ ይመክራሉ                                                                                                                                                  | እመክራለሁ            | 1    |  |
|     |                                                         |                                                                                                                                                                                       | አልመክርም            | 2    |  |

| 12 A - የነፈሰጡር እናቶች ማረፊያ ቤት-ተጠቃሚ ላልሆኑት                                                                                                                                                                                                                                                        |                             |                                                   |                   |      |     |
|----------------------------------------------------------------------------------------------------------------------------------------------------------------------------------------------------------------------------------------------------------------------------------------------|-----------------------------|---------------------------------------------------|-------------------|------|-----|
| Nr                                                                                                                                                                                                                                                                                           | Variable                    | Questions & filters                               | Coding categories | Skip |     |
| 97.                                                                                                                                                                                                                                                                                          | Knowledge MWH               | ስለ ነፈሰጡር እናቶች ማረፊያ ቤት ሰምተው ያውቃሉ                   | አዎ                | 1    |     |
|                                                                                                                                                                                                                                                                                              |                             |                                                   | አላውቅም             | 2    | 101 |
| <p>ከዚህ በመቀጠል የነፈሰጡር እናቶችን ማረፊያ ቤትን በተመለከተ በሰፊው ለሁሉም እናቶች ገለጻ ያድርጉ፤ የነፈሰጡር እናቶች ማረፊያ ቤት ማለት በወለድ ወቅት ችግር ሲገጥማቸው ይቻላል ተብሎ የሚገመቱ እናቶች የመውለጃ ቀናቸው ሁለት ወይም ሶስት ሳምንት ሲቀረው ችግር ቢከሰት በአፕሪኮን ማዋለድ በሚችል የጤና ተቋም ውስጥ በተሰራ ማረፊያ ቤት ተቀምጠው እስኪወጡ ድረስ የሚያርፉበት ቤት ነው ምጥ ሲጀምር በጤና ተቋም እንዲወልዱ ይደረጋል ማለት ነው</p> |                             |                                                   |                   |      |     |
| 98.                                                                                                                                                                                                                                                                                          | Knowledge MWH: availability | በእርስዎ አካባቢ የነፈሰጡር እናቶች ማረፊያ ቤት አገልግሎት የሚሰጥ ተቋም አለ | አለ                | 1    |     |
|                                                                                                                                                                                                                                                                                              |                             |                                                   | የለም               | 2    | 101 |
| 99.                                                                                                                                                                                                                                                                                          | Location MWH                | የነፈሰጡር እናቶች ማረፊያ ቤቱ የት ነው ያለው                     | አጣጥ ሆስፒታል         | A    |     |
|                                                                                                                                                                                                                                                                                              |                             |                                                   | መርሲ ሆስፒታል         | M    |     |
|                                                                                                                                                                                                                                                                                              |                             |                                                   | ሌላ ግለፅ            | 99   |     |
| 100.                                                                                                                                                                                                                                                                                         | Stay MWH                    | በሆስፒታል ውስጥ በሚገኝ የነፈሰጡር እናቶች ማረፊያ ቤት ተገልግለው ያውቃሉ   | አውቃለሁ             | 1    | 116 |
|                                                                                                                                                                                                                                                                                              |                             |                                                   | አላውቅም             | 2    |     |

|      |                           |                                                                               |                     |    |  |
|------|---------------------------|-------------------------------------------------------------------------------|---------------------|----|--|
| 101. | Knowledge MWH: advantages | <p>በነፈሰጡር እናቶች ማረፊያ ቤት መቆየቱ ጥቅሙ ምንድን ነው ብለው ያስባሉ</p> <p>ሁሉንም ምክንያቶች ይመዘግቡ</p> | በቅርበት ህክምና ለማግኘት    | 1  |  |
|      |                           |                                                                               | የእናት ህይወት ያድናል      | 2  |  |
|      |                           |                                                                               | የልጅ ህይወት ያድናል       | 3  |  |
|      |                           |                                                                               | ከወለድ በፊት እረፍት ለማድረግ | 4  |  |
|      |                           |                                                                               | ሌላ ግለፅ              | 99 |  |
|      |                           |                                                                               | ምክንያቱን አለማወቅ        | 98 |  |

| ተጠያቂዎ ጥቅሙ ካልገባቸው እባክዎን ያስረዱ                                                                                               |                       |                                                                                                                          |              |   |  |
|---------------------------------------------------------------------------------------------------------------------------|-----------------------|--------------------------------------------------------------------------------------------------------------------------|--------------|---|--|
| 102.                                                                                                                      | Likeliness stay MWH   | <p>ለአሁኑ ወይም ለቀጣዩ እርግዝናዎ በነፈሰጡር እናቶች ማረፊያ ቤት ከመውለጃዎ ጊዜ ከ2 - 4 ሳምንት ቀደም ብለሽ ልትቆይ የምትችሉበት እድል ምን ያክል ነው(መቆየት አለብሽ ብትባይ)</p> | በጣም ሰፊ እድል   | 1 |  |
|                                                                                                                           |                       |                                                                                                                          | ሰፊ እድል       | 2 |  |
|                                                                                                                           |                       |                                                                                                                          | ጠባብ እድል      | 3 |  |
|                                                                                                                           |                       |                                                                                                                          | በጣም ጠባብ እድል  | 4 |  |
| <p>አስረዳ-በነፈሰጡር እናቶች ማረፊያ ቤት ከመውለጃዎ ጊዜ ከ2 - 4 ሳምንት ቀደም ብለሽ መቆየት አለብሽ ብትባይ ወደ ማረፊያ ቤቱ ከመምጣት/አገልግሎቱን ከማግኘት ምን ሊያግድሽ ይችላል</p> |                       |                                                                                                                          |              |   |  |
| 103.                                                                                                                      | Barrier MWH transport | <ul style="list-style-type: none"> <li>ወደ ነፈሰጡር እናቶች ማረፊያ ቤት በትራንስፖርት ለመምጣት</li> </ul>                                   | አቅሜ ይፈቅድልኛል  | 1 |  |
|                                                                                                                           |                       |                                                                                                                          | አቅሜ አይፈቅድልኝም | 2 |  |

| Nr   | Variable                                    | Questions & filters                                                                                                  | Coding categories | Skip |      |
|------|---------------------------------------------|----------------------------------------------------------------------------------------------------------------------|-------------------|------|------|
| 104. | Barrier MWH food                            | <ul style="list-style-type: none"> <li>በምትቆይበት ጊዜ ለምግብ/ለቀለብ ያለው የገንዘብ ወጭ</li> </ul>                                  | አቅሜ ይፈቅድልኛል       | 1    |      |
|      |                                             |                                                                                                                      | አቅሜ አይፈቅድልኝም      | 2    |      |
| 105. | Barrier MWH utensils                        | <ul style="list-style-type: none"> <li>በምትቆይበት ጊዜ ለምግብ ማብሰያ የሚሆኑ የራስሽን እቃዎች ይዞ ማምጣት</li> </ul>                       | የሚቻል              | 1    |      |
|      |                                             |                                                                                                                      | የማይቻል             | 2    |      |
| 106. | Barrier MWH waiting time respondent         | <ul style="list-style-type: none"> <li>ከመውለደሽ በፊት ከ 2 እስከ 4 ሳምንታት ለሚያክል ጊዜ ከቤት ርቀሽ በማረፊያ ቤቱ መቆየት</li> </ul>          | የሚቻል              | 1    |      |
|      |                                             |                                                                                                                      | የማይቻል             | 2    |      |
| 107. | Barrier MWH waiting time attendant          | <ul style="list-style-type: none"> <li>ለሁለት ሳምንትና ከዚያ በላይ ለሚያክል ጊዜ አብሮ በማረፊያ ቤቱ በመሆን ሊያስታምምሽ የሚችል ሰው ማግኘት</li> </ul> | የሚቻል              | 1    |      |
|      |                                             |                                                                                                                      | የማይቻል             | 2    |      |
| 108. | Barrier MWH children at home                | <ul style="list-style-type: none"> <li>አንች በማረፊያ ቤቱ በምትቆይበት ጊዜ ቤትሽ ልጆችሽን የሚንከባከብ ቤተሰብ ወይም ዘመድ ማግኘት</li> </ul>        | የሚቻል              | 1    |      |
|      |                                             |                                                                                                                      | የማይቻል             | 2    |      |
| 109. | Barrier MWH household chores                | <ul style="list-style-type: none"> <li>አንች በማረፊያ ቤቱ በምትቆይበት ጊዜ ቤትሽ ውስጥ ያለውን ስራ የሚያግዝ ዘመድ ወይም ቤተሰብ ማግኘት</li> </ul>    | የሚቻል              | 1    |      |
|      |                                             |                                                                                                                      | የማይቻል             | 2    |      |
| 110. | Barrier MWH loss from productivity activity | <ul style="list-style-type: none"> <li>ለረጅም ጊዜ ከስራሽ መራቅ(ከቤት ውስጥ ስራ ውጭ)</li> </ul>                                    | የሚቻል              | 1    |      |
|      |                                             |                                                                                                                      | የማይቻል             | 2    |      |
| 111. | Barrier MWH attendant loss productivity     | <ul style="list-style-type: none"> <li>አስታማሚሽ ከስራው/ዋ ለረጅም ጊዜ መራቅ</li> </ul>                                          | የሚቻል              | 1    |      |
|      |                                             |                                                                                                                      | የማይቻል             | 2    |      |
| 112. | Barrier MWH dependent child                 | <ul style="list-style-type: none"> <li>ልጆችሽን ከአንች ጋር ወደ ነፈሰጡር ማረፊያ ቤቱ ይዞ መምጣት</li> </ul>                             | አስፈላጊ             | 1    |      |
|      |                                             |                                                                                                                      | አላስፈላጊ            | 2    |      |
| 113. | Barrier MWH family visits                   | <ul style="list-style-type: none"> <li>ጠያቂ ቤተሰብ መነሩ</li> </ul>                                                       | አስፈላጊ             | 1    |      |
|      |                                             |                                                                                                                      | አላስፈላጊ            | 2    |      |
| 114. | Other barriers MWH                          | በነፈሰጡር እናቶች ማቆያ ቤት ከመቆየት ሊያግድ የሚችል ሌላ እሚያስቡት ምክንያት አለ                                                                | አለ                | 1    |      |
|      |                                             |                                                                                                                      | የለም               | 2    | መጨረሻ |
| 115. | Other barriers specified                    | አለ ካሉ እባክዎትን ያስረዱ<br>በነፈሰጡር እናቶች ማቆያ ቤት ከመቆየት ሊያግድ የሚችል ሌላ እሚያስቡት ምክንያት አለ                                           |                   | 99   | መጨረሻ |

| 12 B-የነፈሰጡር እናቶች ማቆያ ቤት-ተጠቃሚ ለሆኑ |                       |                                                                                                            |                                                      |                 |                                           |
|----------------------------------|-----------------------|------------------------------------------------------------------------------------------------------------|------------------------------------------------------|-----------------|-------------------------------------------|
| Nr                               | Variable              | Questions & filters                                                                                        | Coding categories                                    | Skip            |                                           |
| 116.                             | Location stay MWH     | የትኛው የነፈሰጡር እናቶች ማቆያ ቤት ነው የቆዩት ?                                                                          | አጣጥ ሆስፒታል                                            | A               |                                           |
|                                  |                       |                                                                                                            | ሌላ ግለፅ                                               | M               |                                           |
|                                  |                       |                                                                                                            | መርሲ ሆስፒታል                                            | 99              |                                           |
| 117.                             | Reason admission MWH  | የነፈሰጡር እናቶች ማቆያ ቤት እንዲቆዩ ያደረገዎት ምክንያት ምንድን ነው?<br><br>ተጠያቂዎ ምክንያቱን እማያውቁት ከሆነ ሱፐርቫይዘር ምክንያቱን ከካርዱ ላይ ይመልከት | ከዚህ ቀደም በቀድሞ ጥገና መውለድ                                | 1               |                                           |
|                                  |                       |                                                                                                            | ከዚህ ቀደም ሽንት ወይም ሰገራን የመቆጣጠር ችግር ኖሮባት በህክምና የተስተካከለላት | 2               |                                           |
|                                  |                       |                                                                                                            | መንታ ማርገዝ                                             | 3               |                                           |
|                                  |                       |                                                                                                            | ከ 6 ጊዜ በላይ መውለድ                                      | 4               |                                           |
|                                  |                       |                                                                                                            | ከዚህ ቀደም በማሕፀን ውስጥ የፅንሱ መሞት የጋጠማጥ                     | 5               |                                           |
|                                  |                       |                                                                                                            | የፅንሱ አቀማመጥ ጥሩ ካልሆነ                                   | 6               |                                           |
|                                  |                       |                                                                                                            | ፅንሱ በግሩ ሲመጣ                                          | 7               |                                           |
|                                  |                       |                                                                                                            | ከወሊድ በፊት ደም መፍሰስ ስኖር                                 | 8               |                                           |
|                                  |                       |                                                                                                            | ደም ማነስ                                               | 9               |                                           |
|                                  |                       |                                                                                                            | Polyhydramnios                                       | 10              |                                           |
|                                  |                       |                                                                                                            | ደም ግፊትና ሌላ የጤና ችግር                                   | 11              |                                           |
|                                  |                       |                                                                                                            | መኖሪያቸው ከሆስፒታሉ በጣም መራቅ                                | 12              |                                           |
|                                  |                       |                                                                                                            | ሌላ ግለፅ                                               | 99              |                                           |
|                                  |                       |                                                                                                            | 118.                                                 | Referral to MWH | ወደ ነፈሰጡር እናቶች ማቆያ ቤት እንዲሄዱ የተነገርዎት ከየት ነው |
| ከጤና ኤላ                           | 2                     |                                                                                                            |                                                      |                 |                                           |
| ከጤና ጣቢያ                          | 3                     |                                                                                                            |                                                      |                 |                                           |
| ከሆስፒታል                           | 4                     |                                                                                                            |                                                      |                 |                                           |
| ሌላ ግለፅ                           | 99                    |                                                                                                            |                                                      |                 |                                           |
| 119.                             | Duration stay MWH     | ለምን ያክል ጊዜ በነፈሰጡር እናቶች ማቆያ ቤት ቆዩ?<br><br>የቆዩበትን ጊዜ በሙሉ ወይም በክፍልፋይ ሳምንታት ይግለጹ                               |                                                      |                 |                                           |
| 120.                             | Decision-making MWH   | በነፈሰጡር እናቶች ማቆያ ቤት እዲቆዩ ማን ወሰነ                                                                             | እኔ                                                   | 1               |                                           |
|                                  |                       |                                                                                                            | ባለቤቴ                                                 | 2               |                                           |
|                                  |                       |                                                                                                            | በጋራ                                                  | 3               |                                           |
|                                  |                       |                                                                                                            | ሌላ ግለፅ                                               | 99              |                                           |
| 121.                             | Attendant MWH         | በነፈሰጡር እናቶች ማቆያ ቤት በሚቆዩበት ወቅት አስታማሚዎ ማን ነበር                                                                | ባለቤትዎ                                                | 1               |                                           |
|                                  |                       |                                                                                                            | ዘመድ/ሌላ የቤተሰብ አባል                                     | 2               |                                           |
|                                  |                       |                                                                                                            | ሌላ ግለፅ                                               | 99              |                                           |
| 122.                             | Financial support MWH | በነፈሰጡር እናቶች ማቆያ ቤት በሚቆዩበት ወቅት የገንዘብ ድጋፍ ከማን ነበር የሚያገኙት                                                     | ከራሴ                                                  | 1               |                                           |
|                                  |                       |                                                                                                            | ባለቤቴ                                                 | 2               |                                           |
|                                  |                       |                                                                                                            | ዘመድ/ሌላ የቤተሰብ አባል                                     | 3               |                                           |
|                                  |                       |                                                                                                            | ሌላ ግለፅ                                               | 99              |                                           |

| Nr                                                                                  | Variable                                    | Questions & filters                                                                           | Coding categories   | Skip |
|-------------------------------------------------------------------------------------|---------------------------------------------|-----------------------------------------------------------------------------------------------|---------------------|------|
| 123.                                                                                | Social support MWH                          | በነፈሰጡር እናቶች ማቆያ ቤት በሚቆዩበት ወቅት? (ልጆችን በመንከባከብ፣ የቤት ውስጥ ስራዎችን በመስራት እና በሞራል እገዛ የሚያደርግልዎ ማን ነው) | ባለቤቱ                | 1    |
|                                                                                     |                                             |                                                                                               | ዘመድ/ሌላ የቤተሰብ አባል    | 2    |
|                                                                                     |                                             |                                                                                               | ሌላ ግለሰብ             | 99   |
| 124.                                                                                | Advantages MWH                              | በነፈሰጡር እናቶች ማቆያ ቤት መቆየቱ ጥቅሙ ምንድን ነው ብለው ያስባሉ                                                  | በቅርበት ህክምና ለማግኘት    | 1    |
|                                                                                     |                                             |                                                                                               | የእናት ህይወት ያድናል      | 2    |
|                                                                                     |                                             |                                                                                               | የልጅ ህይወት ያድናል       | 3    |
|                                                                                     |                                             |                                                                                               | ከወሊድ በፊት እረፍት ለማድረግ | 4    |
|                                                                                     |                                             |                                                                                               | ሌላ ግለሰብ             | 99   |
| <b>አስረዳ-አባክዎት በቀጣዮቹ ነገሮች ላይ ያልዎትን አስተያየት ይግለጹልን አገልግሎቱን ለማሻሻል ስለሚረዳን ሳትሳቀቁ ንገሪኝ</b> |                                             |                                                                                               |                     |      |
| 125.                                                                                | Barrier MWH transport                       | <ul style="list-style-type: none"> <li>ወደ ነፈሰጡር እናቶች ማቆያ ቤት ለመምጣት ያለው ትራንስፖርት</li> </ul>      | አቅሜ ይፈቅድልኛል         | 1    |
|                                                                                     |                                             |                                                                                               | አቅሜ አይፈቅድልኝም        | 2    |
| 126.                                                                                | Barrier MWH food                            | <ul style="list-style-type: none"> <li>በሚቆዩበት ጊዜ ለምግብ ያለው ወጭ</li> </ul>                       | አቅሜ ይፈቅድልኛል         | 1    |
|                                                                                     |                                             |                                                                                               | አቅሜ አይፈቅድልኝም        | 2    |
| 127.                                                                                | Barrier MWH utensils                        | <ul style="list-style-type: none"> <li>በሚቆዩበት ጊዜ ለምግብ ማብሰያ የሚሆኑ የራስ እቃ መምጣት</li> </ul>        | የሚቻል                | 1    |
|                                                                                     |                                             |                                                                                               | የማይቻል               | 2    |
| 128.                                                                                | Barrier MWH waiting time respondent         | <ul style="list-style-type: none"> <li>ከወሊድ በፊት ከ2-4ሳምንታት ያክል መቆየት</li> </ul>                 | የሚቻል                | 1    |
|                                                                                     |                                             |                                                                                               | የማይቻል               | 2    |
| 129.                                                                                | Barrier MWH waiting time attendant          | <ul style="list-style-type: none"> <li>ለሁለት ሳምንት ያክል አብሮ የሚሆን አስታማሚ ማግኘት</li> </ul>           | የሚቻል                | 1    |
|                                                                                     |                                             |                                                                                               | የማይቻል               | 2    |
| 130.                                                                                | Barrier MWH children at home                | <ul style="list-style-type: none"> <li>ልጆችን የሚንከባከብ ቤተሰብ/ዘመድ ማግኘት</li> </ul>                  | የሚቻል                | 1    |
|                                                                                     |                                             |                                                                                               | የማይቻል               | 2    |
| 131.                                                                                | Barrier MWH household chores                | <ul style="list-style-type: none"> <li>ቤት ውስጥ ያለውን ስራ የሚያግዝ ዘመድ/ቤተሰብ ማግኘት</li> </ul>          | የሚቻል                | 1    |
|                                                                                     |                                             |                                                                                               | የማይቻል               | 2    |
| 132.                                                                                | Barrier MWH loss from productivity activity | <ul style="list-style-type: none"> <li>ፈጻሚ ከቤት መራቅ የማይታሰብ ነው</li> </ul>                       | የሚቻል                | 1    |
|                                                                                     |                                             |                                                                                               | የማይቻል               | 2    |
| 133.                                                                                | Barrier MWH attendant loss productivity     | <ul style="list-style-type: none"> <li>አስታማሚዎ ከስራው/ዋ ለረጅም ጊዜ መራቅ አትችልም/አይችልም</li> </ul>       | የሚቻል                | 1    |
|                                                                                     |                                             |                                                                                               | የማይቻል               | 2    |
| 134.                                                                                | Barrier MWH dependent child                 | <ul style="list-style-type: none"> <li>ልጆችን አንድ ላይ ወደ ነፈሰጡር ማቆያ ቤቱ ይዞ መምጣት</li> </ul>         | አስፈላጊ               | 1    |
|                                                                                     |                                             |                                                                                               | አላስፈላጊ              | 2    |
| 135.                                                                                | Barrier MWH family visits                   | <ul style="list-style-type: none"> <li>ጠያቂ ቤተሰብ መነሩ</li> </ul>                                | አስፈላጊ               | 1    |
|                                                                                     |                                             |                                                                                               | አላስፈላጊ              | 2    |
| 136.                                                                                | Other barriers MWH                          | በነፈሰጡር እናቶች ማቆያ ቤት ከመቆየት ሊያግድ የሚችል ሌላ እሚያስቡት ምክንያት አለ                                         | አለ                  | 1    |
|                                                                                     |                                             |                                                                                               | የለም                 | 2    |
| 137.                                                                                | Other barriers specified                    | አለ ካሉ እባክዎትን ያስረዱ                                                                             |                     | 99   |
| የነፈሰጡር እናቶች ማቆያ ቤት ከሚከተሉት ነገሮች አንጻር እንዴት ይገመግሙታል አገልግሎቱን ለማሻሻል ስለሚረዳን ሳትሳቀቁ ንገሪኝ    |                                             |                                                                                               |                     |      |



| Nr   | Variable                               | Questions & filters                                                     | Coding categories | Skip |      |
|------|----------------------------------------|-------------------------------------------------------------------------|-------------------|------|------|
| 138. | Perceived quality MWH facilities       | <ul style="list-style-type: none"> <li>ቤቱ፣ ያሉት የመገልገያ ቁሳቁስ</li> </ul>   | ጥሩ                | 1    |      |
|      |                                        |                                                                         | አጥጋቢ              | 2    |      |
|      |                                        |                                                                         | በቂ                | 3    |      |
|      |                                        |                                                                         | አነስተኛ             | 4    |      |
| 139. | Perceived quality MWH hygiene          | <ul style="list-style-type: none"> <li>ንፅሕናውስ</li> </ul>                | ጥሩ                | 1    |      |
|      |                                        |                                                                         | አጥጋቢ              | 2    |      |
|      |                                        |                                                                         | በቂ                | 3    |      |
|      |                                        |                                                                         | አነስተኛ             | 4    |      |
| 140. | Perceived quality MWH facilities       | <ul style="list-style-type: none"> <li>የግል ነፃነት</li> </ul>              | ጥሩ                | 1    |      |
|      |                                        |                                                                         | አጥጋቢ              | 2    |      |
|      |                                        |                                                                         | በቂ                | 3    |      |
|      |                                        |                                                                         | አነስተኛ             | 4    |      |
| 141. | Perceived quality MWH support women    | <ul style="list-style-type: none"> <li>እርስ በርስ መደጋገፍ</li> </ul>         | ጥሩ                | 1    |      |
|      |                                        |                                                                         | አጥጋቢ              | 2    |      |
|      |                                        |                                                                         | በቂ                | 3    |      |
|      |                                        |                                                                         | አነስተኛ             | 4    |      |
| 142. | Perceived quality MWH space attendants | <ul style="list-style-type: none"> <li>ለአስታማሚ እና ለጠያቂ ያለው ቦታ</li> </ul> | ጥሩ                | 1    |      |
|      |                                        |                                                                         | አጥጋቢ              | 2    |      |
|      |                                        |                                                                         | በቂ                | 3    |      |
|      |                                        |                                                                         | አነስተኛ             | 4    |      |
| 143. | MWH areas improvement                  | መሻሻል አለበት የሚሉት ነገር አለ                                                   |                   |      |      |
| 144. | Recommendation MWH                     | ሌላ ነፈሰጡር እናቶች የነፈሰጡር እናቶች ማቆያ ቤትን እንዲጠቀሙ ይመክራሉ?                         | እመክራለሁ            | 1    | መጨረሻ |
|      |                                        |                                                                         | አልመክርም            | 2    |      |
