# Supplementary material for: Factors associated with intended use of a maternity waiting home in Southern Ethiopia: a community-based cross-sectional study
Source: BMC Pregnancy Childbirth. 2018 Jan 19;18:38. doi: 10.1186/s12884-018-1670-z (PMC5775531; doi:10.1186/s12884-018-1670-z)
Supplement: Supplementary file 1 — Data collection instrument - English version informed consent form and questionnaire. (PDF 856 kb) [file 12884_2018_1670_MOESM1_ESM.pdf]

## Informed Consent

### Survey Maternal Health & Maternity Waiting Home

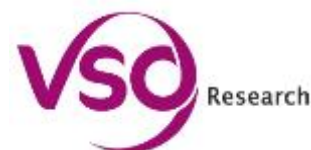

| Introduction & Informed consent                                                                                                                                                                                                                                                                                                                                                                                                                                                                                                                                                                                                                                                                                                                                                                                                                                                                                                                                                                                                                                                                                                                                                                                                                                                                                        |                                                                               |
|------------------------------------------------------------------------------------------------------------------------------------------------------------------------------------------------------------------------------------------------------------------------------------------------------------------------------------------------------------------------------------------------------------------------------------------------------------------------------------------------------------------------------------------------------------------------------------------------------------------------------------------------------------------------------------------------------------------------------------------------------------------------------------------------------------------------------------------------------------------------------------------------------------------------------------------------------------------------------------------------------------------------------------------------------------------------------------------------------------------------------------------------------------------------------------------------------------------------------------------------------------------------------------------------------------------------|-------------------------------------------------------------------------------|
| <p>"Hello. My name is _____ and I am working with an NGO called <b>VSO</b>. We are conducting a research amongst mothers who are currently pregnant or who have delivered in the last three years in the Gurage Zone. The objective is to find out more about maternal health and the use of Maternity Waiting Homes. The information we collect will help Butajira Hospital to improve its maternal health services. You were selected for the survey. The survey usually takes about <b>45 minutes</b>. All of the answers you give will be confidential and will not be shared with anyone other than members of our survey team. You don't have to be in the survey, but we hope you will agree to answer the questions since your views are important. If I ask you any question you don't want to answer, just let me know and I will go on to the next question or you can stop the interview at any time.</p> <p>Do you have any questions?<br/>May I begin the interview now?</p> <p>For the interview it is important for me to know if you have given birth in the last 3 years or if you are currently pregnant?<br/>IF YES: CONTINUE THE INTERVIEW. IF NO: "Thank you for your time. For this survey, we are specifically interviewing women who have recently giving birth or who are pregnant now."</p> |                                                                               |
| <b>Name of the respondent:</b>                                                                                                                                                                                                                                                                                                                                                                                                                                                                                                                                                                                                                                                                                                                                                                                                                                                                                                                                                                                                                                                                                                                                                                                                                                                                                         |                                                                               |
| <b>Name of the household head:</b>                                                                                                                                                                                                                                                                                                                                                                                                                                                                                                                                                                                                                                                                                                                                                                                                                                                                                                                                                                                                                                                                                                                                                                                                                                                                                     |                                                                               |
| Signature of interviewer:                                                                                                                                                                                                                                                                                                                                                                                                                                                                                                                                                                                                                                                                                                                                                                                                                                                                                                                                                                                                                                                                                                                                                                                                                                                                                              | Date:                                                                         |
| <b>RESPONDENT AGREES TO BE INTERVIEWED -&gt;<br/>Start with question 1</b>                                                                                                                                                                                                                                                                                                                                                                                                                                                                                                                                                                                                                                                                                                                                                                                                                                                                                                                                                                                                                                                                                                                                                                                                                                             | <b>RESPONDENT DOES NOT AGREE TO BE<br/>INTERVIEWED -&gt; End of interview</b> |

## Survey Maternal Health & Maternity Waiting Home

| 1 - Interviewer visit |          |                                                                        |                                |    |
|-----------------------|----------|------------------------------------------------------------------------|--------------------------------|----|
| Nr                    | Variable | Questions & filters                                                    | Coding categories              |    |
| 1.                    | Cluster  | <b>Location of interview</b><br><br>TO BE FILLED IN BY THE INTERVIEWER | MWH Attat Hospital             | 1  |
|                       |          |                                                                        | Post-labor ward Attat Hospital | 2  |
|                       |          |                                                                        | MCH Attat Hospital             | 3  |
|                       |          |                                                                        | ANC Attat Hospital             | 4  |
|                       |          |                                                                        | Post-labor ward Butajira       | 5  |
|                       |          |                                                                        | MCH Butajira                   | 6  |
|                       |          |                                                                        | ANC Butajira Hospital          | 7  |
|                       |          |                                                                        | Community                      | 8  |
|                       |          |                                                                        | Other location, specify:       | 99 |
| 2.                    |          | <b>Data collector ID</b><br>TO BE FILLED IN BY THE INTERVIEWER         |                                |    |
| 3.                    |          | <b>Language interview</b><br>TO BE FILLED IN BY THE INTERVIEWER        | Amharic                        | 1  |
|                       |          |                                                                        | Other, specify:                | 99 |
| 4.                    |          | <b>Language respondent</b>                                             | Amharic                        | 1  |
|                       |          |                                                                        | Other, specify:                | 99 |
| 5.                    |          | <b>Supervisor</b><br>TO BE FILLED IN BY THE INTERVIEWER                |                                |    |
| 6.                    |          | <b>Office editor</b><br>TO BE FILLED IN BY OFFICE EDITOR               |                                |    |

| 2 - Identification |                  |                                                                                                                                                |                              |    |
|--------------------|------------------|------------------------------------------------------------------------------------------------------------------------------------------------|------------------------------|----|
| Nr                 | Variable         | Questions & filters                                                                                                                            | Coding categories            |    |
| 7.                 | Household number | <b>Household number</b>                                                                                                                        |                              |    |
| 8.                 | Household head   | <b>Household head</b>                                                                                                                          | Male                         | 1  |
|                    |                  |                                                                                                                                                | Female                       | 2  |
| 9.                 | Locality         | <b>Locality Name</b>                                                                                                                           |                              |    |
| 10.                | Woreda           | <b>Woreda</b>                                                                                                                                  | Butajira City Administration | 1  |
|                    |                  |                                                                                                                                                | Meskan                       | 2  |
|                    |                  |                                                                                                                                                | Mareko                       | 3  |
|                    |                  |                                                                                                                                                | Soddo                        | 4  |
|                    |                  |                                                                                                                                                | Other, specify               | 99 |
| 11.                | Region           | TO BE FILLED IN BY THE INTERVIEWER:<br>Urban / Rural<br><br>Urban: Butajira City, Administration, Attat, Welkite<br>Rural: outside these areas | Urban                        | 1  |
|                    |                  |                                                                                                                                                | Rural                        | 2  |
| 12.                |                  | TO BE FILLED IN BY OFFICE EDITOR: SURVEY #                                                                                                     |                              |    |

| <b>3 - Respondent's background &amp; work</b> |                                                                             |                       |                                                                                                             |                              |    |      |
|-----------------------------------------------|-----------------------------------------------------------------------------|-----------------------|-------------------------------------------------------------------------------------------------------------|------------------------------|----|------|
|                                               | EXPLAIN: I will start the survey with some questions about your background. |                       |                                                                                                             |                              |    |      |
| Nr                                            | DHS                                                                         | Variable              | Questions & filters                                                                                         | Coding categories            |    | Skip |
| 13.                                           | 102                                                                         | Age                   | In what year were you born?                                                                                 | Year                         |    |      |
|                                               |                                                                             |                       |                                                                                                             | Don't know year              | 98 |      |
| 13A.                                          | 103A                                                                        | Age estimation        | IN CASE OF DOUBT: ESTIMATION OF AGE CATEGORY BY THE INTERVIEWER                                             | 19 - 24                      | 1  |      |
|                                               |                                                                             |                       |                                                                                                             | 25 - 29                      | 2  |      |
|                                               |                                                                             |                       |                                                                                                             | 30 - 34                      | 3  |      |
|                                               |                                                                             |                       |                                                                                                             | 35 - 39                      | 4  |      |
|                                               |                                                                             |                       |                                                                                                             | 40 - 44                      | 5  |      |
|                                               |                                                                             |                       |                                                                                                             | 45 - 49                      | 6  |      |
| 14.                                           | 603                                                                         | Marital status        | What is your marital status?<br><br>IF MARRIED, SPECIFY IF 'NOT LIVING TOGETHER' AND/OR 'POLYGAMY MARRIAGE' | Single                       | 1  | 16   |
|                                               |                                                                             |                       |                                                                                                             | Living together, not married | 2  | 16   |
|                                               |                                                                             |                       |                                                                                                             | Married                      | 3  |      |
|                                               |                                                                             |                       |                                                                                                             | Not living together          | 3a |      |
|                                               |                                                                             |                       |                                                                                                             | Polygamy                     | 3b |      |
|                                               |                                                                             |                       |                                                                                                             | Separated/divorced           | 4  |      |
|                                               |                                                                             |                       |                                                                                                             | Widowed                      | 5  |      |
| 15.                                           | 611                                                                         | Age at first marriage | How old were you when you (first) got married?                                                              | Age in years                 |    |      |
| 16.                                           | 113                                                                         | Religion              | What is your religion?                                                                                      | Orthodox                     | 1  |      |
|                                               |                                                                             |                       |                                                                                                             | Catholic                     | 2  |      |
|                                               |                                                                             |                       |                                                                                                             | Protestant                   | 3  |      |
|                                               |                                                                             |                       |                                                                                                             | Muslim                       | 4  |      |
|                                               |                                                                             |                       |                                                                                                             | Traditional                  | 5  |      |
|                                               |                                                                             |                       |                                                                                                             | Other, specify:              | 99 |      |
| 17.                                           | 114                                                                         | Ethnicity             | What is your ethnicity?                                                                                     | Sebat Bet Gurage             | 1  |      |
|                                               |                                                                             |                       |                                                                                                             | Silt'e                       | 2  |      |
|                                               |                                                                             |                       |                                                                                                             | Soddo Gurage                 | 3  |      |
|                                               |                                                                             |                       |                                                                                                             | Mareqo / Libido              | 4  |      |
|                                               |                                                                             |                       |                                                                                                             | Amhara                       | 5  |      |
|                                               |                                                                             |                       |                                                                                                             | Kebena                       | 6  |      |
|                                               |                                                                             |                       |                                                                                                             | Other, specify:              | 99 |      |
| 18.                                           | 104                                                                         | School attendance     | Have you ever attended school?                                                                              | Yes                          | 1  |      |
|                                               |                                                                             |                       |                                                                                                             | No                           | 2  | 20   |
| 19.                                           | 105                                                                         | Educational level     | What is the highest level of school you attended: primary, secondary, technical/vocational or higher?       | Primary                      | 1  | 20   |
|                                               |                                                                             |                       |                                                                                                             | Secondary                    | 2  | 21   |
|                                               |                                                                             |                       |                                                                                                             | Technical/vocational         | 3  | 21   |
|                                               |                                                                             |                       |                                                                                                             | Higher                       | 4  | 21   |

| Nr  | DHS | Variable                  | Questions & filters                                                                                                                                                                                                                                                                                                                                                  | Coding categories                                   | Skip |    |
|-----|-----|---------------------------|----------------------------------------------------------------------------------------------------------------------------------------------------------------------------------------------------------------------------------------------------------------------------------------------------------------------------------------------------------------------|-----------------------------------------------------|------|----|
| 20. | 108 | Literacy                  | Now I would like you to read this sentence to me<br><br>SHOW SENTENCE TO RESPONDENT.<br>IF RESPONDENT CANNOT READ WHOLE SENTENCE, PROBE: Can you read any part of the sentence to me?<br><br>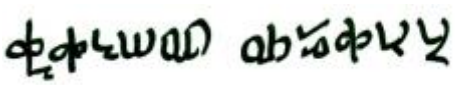<br>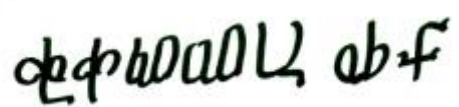 | Cannot read at all                                  | 1    |    |
|     |     |                           |                                                                                                                                                                                                                                                                                                                                                                      | Able to read only parts of the sentence             | 2    |    |
|     |     |                           |                                                                                                                                                                                                                                                                                                                                                                      | Able to read whole sentence                         | 3    |    |
|     |     |                           |                                                                                                                                                                                                                                                                                                                                                                      | No card with required language<br>Specify language: | 4    |    |
|     |     |                           |                                                                                                                                                                                                                                                                                                                                                                      | Blind/visually impaired                             | 5    |    |
| 21. | 111 | Exposure mass media radio | Do you listen to the radio at least once a week, less than once a week or not at all?                                                                                                                                                                                                                                                                                | At least once a week                                | 1    |    |
|     |     |                           |                                                                                                                                                                                                                                                                                                                                                                      | Less than once a week                               | 2    |    |
|     |     |                           |                                                                                                                                                                                                                                                                                                                                                                      | Not at all                                          | 3    |    |
| 22. | 112 | Exposure mass media TV    | Do you watch television at least once a week, less than once a week or not at all?                                                                                                                                                                                                                                                                                   | At least once a week                                | 1    |    |
|     |     |                           |                                                                                                                                                                                                                                                                                                                                                                      | Less than once a week                               | 2    |    |
|     |     |                           |                                                                                                                                                                                                                                                                                                                                                                      | Not at all                                          | 3    |    |
| 23. | 807 | Woman's employment status | Aside from your own housework, have you done any work in the past 12 months?<br><br>IF NECESSARY, EXPLAIN: As you know, some women take up jobs for which they are paid in cash or kind. Others sell things, have a small business or work on the family farm or in the family business.                                                                             | Yes                                                 | 1    |    |
|     |     |                           |                                                                                                                                                                                                                                                                                                                                                                      | No                                                  | 2    | 25 |
| 24. | 811 | Woman's occupation        | What is your occupation, what kind of work do you mainly do?<br><br>If the answer to this question is: "housewife", then the answer to 23 is 'No'.                                                                                                                                                                                                                   | Merchant                                            | 1    |    |
|     |     |                           |                                                                                                                                                                                                                                                                                                                                                                      | Farming                                             | 2    |    |
|     |     |                           |                                                                                                                                                                                                                                                                                                                                                                      | Maid                                                | 3    |    |
|     |     |                           |                                                                                                                                                                                                                                                                                                                                                                      | Secretary/clerical                                  | 4    |    |
|     |     |                           |                                                                                                                                                                                                                                                                                                                                                                      | Other, specify:                                     | 99   |    |

| <b>4 - Partner/Husband's background</b>                                                                                              |     |                             |                                                                                                                |                      |    |      |
|--------------------------------------------------------------------------------------------------------------------------------------|-----|-----------------------------|----------------------------------------------------------------------------------------------------------------|----------------------|----|------|
| IF ANSWER TO QUESTION 14 IS 1, SKIP TO SECTION 6: HOUSEHOLD WEALTH                                                                   |     |                             |                                                                                                                |                      |    |      |
| EXPLAIN: Now I would like to ask you some questions about your (late) husband/partner's background and the way the household is run. |     |                             |                                                                                                                |                      |    |      |
| Nr                                                                                                                                   | DHS | Variable                    | Questions & filters                                                                                            | Coding categories    |    | Skip |
| 25.                                                                                                                                  | 803 | Partner's educational level | Did your (last) husband/partner ever attend school?                                                            | Yes                  | 1  | 27   |
|                                                                                                                                      |     |                             |                                                                                                                | No                   | 2  |      |
| 26.                                                                                                                                  | 804 | Partner's educational level | What is the highest level of school your husband attended: primary, secondary, technical/vocational or higher? | Primary              | 1  |      |
|                                                                                                                                      |     |                             |                                                                                                                | Secondary            | 2  |      |
|                                                                                                                                      |     |                             |                                                                                                                | Technical/vocational | 3  |      |
|                                                                                                                                      |     |                             |                                                                                                                | Higher               | 4  |      |
| 27.                                                                                                                                  | 806 | Partner's employment status | What was your (last) husband's/ partner's occupation? That is, what kind of work does/did he mainly do?        | Merchant             | 1  |      |
|                                                                                                                                      |     |                             |                                                                                                                | Farming              | 2  |      |
|                                                                                                                                      |     |                             |                                                                                                                | Driver               | 3  |      |
|                                                                                                                                      |     |                             |                                                                                                                | Government employee  | 4  |      |
|                                                                                                                                      |     |                             |                                                                                                                | Unemployed           | 5  |      |
|                                                                                                                                      |     |                             |                                                                                                                | Other, specify:      | 99 |      |

| <b>5 - Household chores / decision-making</b> |      |                           |                                                                                                                                                                                                                |                   |    |      |
|-----------------------------------------------|------|---------------------------|----------------------------------------------------------------------------------------------------------------------------------------------------------------------------------------------------------------|-------------------|----|------|
| Nr                                            | DHS  | Variable                  | Questions & filters                                                                                                                                                                                            | Coding categories |    | Skip |
| 28.                                           |      | Decision-making earnings  | Who usually decides how the family earnings are spent?                                                                                                                                                         | Respondent        | 1  |      |
|                                               |      |                           |                                                                                                                                                                                                                | Husband/partner   | 2  |      |
|                                               |      |                           |                                                                                                                                                                                                                | Jointly           | 3  |      |
|                                               |      |                           |                                                                                                                                                                                                                | No earnings       | 4  |      |
|                                               |      |                           |                                                                                                                                                                                                                | Other, specify:   | 99 |      |
| 29.                                           | 822A | Division household chores | Does your husband help you with household chores like looking after the children, cooking, cleaning the house, and doing other work around the house?                                                          | Yes               | 1  |      |
|                                               |      |                           |                                                                                                                                                                                                                | No                | 2  |      |
| 30.                                           | 825  | Presence others           | PRESENCE OF OTHERS AT THIS POINT<br>1. PRESENT AND LISTENING<br>2. PRESENT BUT NOT LISTENING<br>3. NOT PRESENT<br><br>INTRODUCE THE NEXT QUESTION: In some parts of Ethiopia, husbands hit or beat their wife. | CHILDREN < 10     | 1  |      |
|                                               |      |                           |                                                                                                                                                                                                                |                   | 2  |      |
|                                               |      |                           |                                                                                                                                                                                                                |                   | 3  |      |
|                                               |      |                           |                                                                                                                                                                                                                | HUSBAND           | 1  |      |
|                                               |      |                           |                                                                                                                                                                                                                |                   | 2  |      |
|                                               |      |                           |                                                                                                                                                                                                                |                   | 3  |      |
|                                               |      |                           |                                                                                                                                                                                                                | OTHER MALES       | 1  |      |
|                                               |      |                           |                                                                                                                                                                                                                |                   | 2  |      |
|                                               |      |                           |                                                                                                                                                                                                                |                   | 3  |      |
|                                               |      |                           |                                                                                                                                                                                                                | OTHER FEMALES     | 1  |      |
| 31.                                           | 826  | Domestic/sexual violence  | In your opinion, is a husband justified in hitting or beating his wife?                                                                                                                                        | Yes               | 1  |      |
|                                               |      |                           |                                                                                                                                                                                                                | No                | 2  |      |

| 6 - Household wealth |     |                           |                                                                               |                   |   |      |
|----------------------|-----|---------------------------|-------------------------------------------------------------------------------|-------------------|---|------|
| Nr                   | DHS | Variable                  | Questions & filters                                                           | Coding categories |   | Skip |
| 32.                  |     | Household wealth          | Does your household have/own...                                               |                   |   |      |
|                      |     |                           | • Food sufficiency                                                            | Yes               | 1 |      |
|                      |     |                           |                                                                               | No                | 2 |      |
|                      |     |                           | • Running water                                                               | Yes               | 1 |      |
|                      |     |                           |                                                                               | No                | 2 |      |
|                      |     |                           | • Electricity                                                                 | Yes               | 1 |      |
|                      |     |                           |                                                                               | No                | 2 |      |
|                      |     |                           | • Television                                                                  | Yes               | 1 |      |
|                      |     |                           |                                                                               | No                | 2 |      |
|                      |     |                           | • Mobile phone                                                                | Yes               | 1 |      |
|                      |     |                           |                                                                               | No                | 2 |      |
|                      |     |                           | • Land                                                                        | Yes               | 1 |      |
|                      |     |                           |                                                                               | No                | 2 |      |
| 33.                  |     | Relative household wealth | How wealthy is your household compared to other households in your community? | Very wealthy      | 1 |      |
|                      |     |                           |                                                                               | Wealthy           | 2 |      |
|                      |     |                           |                                                                               | Poor              | 3 |      |
|                      |     |                           |                                                                               | Very poor         | 4 |      |

| 7 - Reproduction & Contraception                                            |     |                                       |                                                                                                                                                                                       |                   |   |      |
|-----------------------------------------------------------------------------|-----|---------------------------------------|---------------------------------------------------------------------------------------------------------------------------------------------------------------------------------------|-------------------|---|------|
| Now I would like to ask about all the births you have had during your life. |     |                                       |                                                                                                                                                                                       |                   |   |      |
| Nr                                                                          | DHS | Variable                              | Questions & filters                                                                                                                                                                   | Coding categories |   | Skip |
| 34.                                                                         | 201 | Birth giving                          | Have you ever given birth?                                                                                                                                                            | Yes               | 1 |      |
|                                                                             |     |                                       |                                                                                                                                                                                       | No                | 2 | 36   |
| 35.                                                                         | ... | Total number of live births           | How often did you give birth to a <u>live</u> baby?                                                                                                                                   |                   |   |      |
| 36.                                                                         | ... | IUFD                                  | Have you ever given birth to a boy or girl who was dead?                                                                                                                              | Yes               | 1 |      |
|                                                                             |     |                                       |                                                                                                                                                                                       | No                | 2 | 38   |
| 37.                                                                         | ... | Total number of IUFD                  | How often did you give birth to a dead baby?                                                                                                                                          |                   |   |      |
| 38.                                                                         | 206 | Early neonatal death                  | Have you ever given birth to a boy or girl who was born alive but died within the first week?<br><br>IF NO, PROBE:<br>Any baby who cried or showed signs of life but did not survive? | Yes               | 1 |      |
|                                                                             |     |                                       |                                                                                                                                                                                       | No                | 2 | 40   |
| 39.                                                                         |     | Total number of early neonatal deaths | How often have you given birth to a boy or girl who was born alive but died within a week?                                                                                            |                   |   |      |
| 40.                                                                         | 208 | Total number of births                | TOTAL NUMBER OF BIRTHS, INCL STILLBIRTHS.<br>CALCULATE: ANSWER QUESTION 35 + 37<br>IF NONE, RECORD '00'.                                                                              |                   |   |      |

|                                                                                                                                                                                            |     |                                                   |                                                                                            |                   |    |    |
|--------------------------------------------------------------------------------------------------------------------------------------------------------------------------------------------|-----|---------------------------------------------------|--------------------------------------------------------------------------------------------|-------------------|----|----|
| 41.                                                                                                                                                                                        | 226 | Pregnancy                                         | Are you pregnant now?                                                                      | Yes               | 1  |    |
|                                                                                                                                                                                            |     |                                                   |                                                                                            | No                | 2  | 45 |
|                                                                                                                                                                                            |     |                                                   |                                                                                            | Unsure            | 98 | 45 |
| IF THE ANSWER TO QUESTION 40 IS "00" (ZERO) AND THE ANSWER TO QUESTION 41 IS "NO", CHECK WITH THE RESPONDENT IF THIS IS CORRECT. IF THE ANSWERS REMAIN UNCHANGED, STOP THE INTERVIEW HERE. |     |                                                   |                                                                                            |                   |    |    |
| 42.                                                                                                                                                                                        | 227 | Completed months of pregnancy                     | How many months pregnant are you?<br><br>RECORD NUMBER OF COMPLETED MONTHS                 | Months.....       |    |    |
| 42a                                                                                                                                                                                        |     | ANC Visits                                        | How many ANC visits did you have?                                                          |                   |    |    |
| 42b                                                                                                                                                                                        |     | Place ANC                                         | Where did you have ANC?                                                                    | Health Post       | 1  |    |
|                                                                                                                                                                                            |     |                                                   |                                                                                            | Health Center     | 2  |    |
|                                                                                                                                                                                            |     |                                                   |                                                                                            | Hospital          | 3  |    |
|                                                                                                                                                                                            |     |                                                   |                                                                                            | Other, specify:   | 99 |    |
| 43.                                                                                                                                                                                        |     | Knowledge EDD                                     | Do you know your expected delivery date?                                                   | Yes               | 1  |    |
|                                                                                                                                                                                            |     |                                                   |                                                                                            | No                | 2  |    |
| 44.                                                                                                                                                                                        | 228 | (Un)wanted/<br>planned/sup<br>ported<br>pregnancy | Is the pregnancy planned, wanted, supported?<br><br>RECORD ALL                             | Planned           | 1  |    |
|                                                                                                                                                                                            |     |                                                   |                                                                                            | Wanted            | 2  |    |
|                                                                                                                                                                                            |     |                                                   |                                                                                            | Supported         | 3  |    |
|                                                                                                                                                                                            |     |                                                   |                                                                                            | None of the above | 4  |    |
| 45.                                                                                                                                                                                        | 313 | Contraceptive use                                 | Have you ever used anything or tried in any way to delay or avoid getting pregnant?        | Currently using   | 1  |    |
|                                                                                                                                                                                            |     |                                                   |                                                                                            | Used in the past  | 2  |    |
|                                                                                                                                                                                            |     |                                                   |                                                                                            | Never used        | 3  |    |
| 46.                                                                                                                                                                                        | 820 | Decision-making MCH                               | Who usually makes decisions about maternal & child health care for yourself and your baby? | Respondent        | 1  |    |
|                                                                                                                                                                                            |     |                                                   |                                                                                            | Husband/partner   | 2  |    |
|                                                                                                                                                                                            |     |                                                   |                                                                                            | Jointly           | 3  |    |
|                                                                                                                                                                                            |     |                                                   |                                                                                            | Other, specify:   | 99 |    |

Survey number [   ] [   ] [   ] [   ] [   ]

Data collector ID [   ] [   ] [   ]

**7 continued - Reproduction – Births**

| RECORD ALL BIRTHS (INCL STILLBIRTHS). FOR A MULTIPLE PREGNANCY, USE 1 COLOMN TO RECORD 1 CHILD. IF THERE ARE MORE THAN 6 CHILDREN, USE AN EXTRA SURVEY.                                                                                 |                                           |                                                  |                       |                       |                       |                       |                       |                       | SKIP |
|-----------------------------------------------------------------------------------------------------------------------------------------------------------------------------------------------------------------------------------------|-------------------------------------------|--------------------------------------------------|-----------------------|-----------------------|-----------------------|-----------------------|-----------------------|-----------------------|------|
| Nr                                                                                                                                                                                                                                      | Variables                                 | Filters                                          | 1 <sup>st</sup> birth | 2 <sup>nd</sup> birth | 3 <sup>rd</sup> birth | 4 <sup>th</sup> birth | 5 <sup>th</sup> birth | 6 <sup>th</sup> birth |      |
| 47.                                                                                                                                                                                                                                     | Name of child                             |                                                  |                       |                       |                       |                       |                       |                       |      |
| 48.                                                                                                                                                                                                                                     | Year of birth                             |                                                  |                       |                       |                       |                       |                       |                       |      |
| 49.                                                                                                                                                                                                                                     | Is the child still alive?                 | Yes                                              | 1                     | 1                     | 1                     | 1                     | 1                     | 1                     | 51   |
|                                                                                                                                                                                                                                         |                                           | No                                               | 2                     | 2                     | 2                     | 2                     | 2                     | 2                     |      |
| 50.                                                                                                                                                                                                                                     | At what age did the child die?            | Age in completed min/days/ weeks/ months/years   |                       |                       |                       |                       |                       |                       |      |
| 51.                                                                                                                                                                                                                                     | How old is the child now?                 | Age in completed years                           |                       |                       |                       |                       |                       |                       |      |
| 52.                                                                                                                                                                                                                                     | Number of ANC Visits                      |                                                  |                       |                       |                       |                       |                       |                       |      |
| 53.                                                                                                                                                                                                                                     | Place of delivery                         | Home                                             | 1                     | 1                     | 1                     | 1                     | 1                     | 1                     |      |
|                                                                                                                                                                                                                                         |                                           | Health facility                                  | 2                     | 2                     | 2                     | 2                     | 2                     | 2                     |      |
| IF ALL DELIVERIES WERE IN THE SAME PLACE, FILL IN THE FOLLOWING QUESTIONS FOR THE MOST RECENT DELIVERY.<br>IF THERE IS A CHANGE IN PLACE OF DELIVERY (HOME TO HF, OR HF TO HOME), FILL IN THE FOLLOWING QUESTIONS FOR THESE DELIVERIES. |                                           |                                                  |                       |                       |                       |                       |                       |                       |      |
| FACILITY DELIVERY:                                                                                                                                                                                                                      |                                           |                                                  |                       |                       |                       |                       |                       |                       | 54   |
| HOME DELIVERY:                                                                                                                                                                                                                          |                                           |                                                  |                       |                       |                       |                       |                       |                       | 55   |
| 54.                                                                                                                                                                                                                                     | Why did you deliver in a health facility? | Comfortable                                      | 1                     | 1                     | 1                     | 1                     | 1                     | 1                     | 57   |
|                                                                                                                                                                                                                                         |                                           | Privacy                                          | 2                     | 2                     | 2                     | 2                     | 2                     | 2                     |      |
|                                                                                                                                                                                                                                         | PROBE AND RECORD ALL REASONS              | Complications in previous pregnancies/deliveries | 3                     | 3                     | 3                     | 3                     | 3                     | 3                     |      |
|                                                                                                                                                                                                                                         |                                           | Complications during labor                       | 4                     | 4                     | 4                     | 4                     | 4                     | 4                     |      |
|                                                                                                                                                                                                                                         |                                           | Husband/family decided                           | 5                     | 5                     | 5                     | 5                     | 5                     | 5                     |      |
|                                                                                                                                                                                                                                         |                                           | No/low costs                                     | 6                     | 6                     | 6                     | 6                     | 6                     | 6                     |      |
|                                                                                                                                                                                                                                         |                                           | Other, specify                                   | 99                    | 99                    | 99                    | 99                    | 99                    | 99                    |      |

Survey number [   ] [   ] [   ] [   ] [   ]

Data collector ID [   ] [   ] [   ]

|     | Variables                                                                         | Filters                                                         | 1 <sup>st</sup> birth | 2 <sup>nd</sup> birth | 3 <sup>rd</sup> birth | 4 <sup>th</sup> birth | 5 <sup>th</sup> birth | 6 <sup>th</sup> birth | SKIP |
|-----|-----------------------------------------------------------------------------------|-----------------------------------------------------------------|-----------------------|-----------------------|-----------------------|-----------------------|-----------------------|-----------------------|------|
| 55. | Why did you deliver at home?<br><br>PROBE AND RECORD ALL REASONS.                 | Comfortable                                                     | 1                     | 1                     | 1                     | 1                     | 1                     | 1                     |      |
|     |                                                                                   | Privacy                                                         | 2                     | 2                     | 2                     | 2                     | 2                     | 2                     |      |
|     |                                                                                   | Cultural rituals (presence TBA, placenta burial, massage, etc.) | 3                     | 3                     | 3                     | 3                     | 3                     | 3                     |      |
|     |                                                                                   | Husband/family decided                                          | 4                     | 4                     | 4                     | 4                     | 4                     | 4                     |      |
|     |                                                                                   | No complications                                                | 5                     | 5                     | 5                     | 5                     | 5                     | 5                     |      |
|     |                                                                                   | No/low costs                                                    | 6                     | 6                     | 6                     | 6                     | 6                     | 6                     |      |
|     |                                                                                   | Other, specify                                                  | 99                    | 99                    | 99                    | 99                    | 99                    | 99                    |      |
| 56. | Why didn't you deliver in a health facility?<br><br>PROBE AND RECORD ALL REASONS. | Cost too much                                                   | A                     | A                     | A                     | A                     | A                     | A                     |      |
|     |                                                                                   | Facility (often) not open / possibility of onwards referral     | B                     | B                     | B                     | B                     | B                     | B                     |      |
|     |                                                                                   | Too far/no transportation                                       | C                     | C                     | C                     | C                     | C                     | C                     |      |
|     |                                                                                   | Don't trust facility                                            | D1                    | D1                    | D1                    | D1                    | D1                    | D1                    |      |
|     |                                                                                   | Poor quality of service                                         | D2                    | D2                    | D2                    | D2                    | D2                    | D2                    |      |
|     |                                                                                   | No female provider at facility                                  | E                     | E                     | E                     | E                     | E                     | E                     |      |
|     |                                                                                   | Husband/family did not allow                                    | F                     | F                     | F                     | F                     | F                     | F                     |      |
|     |                                                                                   | No family members allowed                                       | G                     | G                     | G                     | G                     | G                     | G                     |      |
|     |                                                                                   | No privacy                                                      | H                     | H                     | H                     | H                     | H                     | H                     |      |
|     |                                                                                   | No cultural rituals                                             | I                     | I                     | I                     | I                     | I                     | I                     |      |
|     |                                                                                   | No complications                                                | J                     | J                     | J                     | J                     | J                     | J                     |      |
|     |                                                                                   | Fear of an operation                                            | K                     | K                     | K                     | K                     | K                     | K                     |      |
|     |                                                                                   | Other, namely:                                                  | 99                    | 99                    | 99                    | 99                    | 99                    | 99                    |      |
| 57. | Mode of delivery                                                                  | SVD                                                             | 1                     | 1                     | 1                     | 1                     | 1                     | 1                     |      |
|     |                                                                                   | VE                                                              | 2                     | 2                     | 2                     | 2                     | 2                     | 2                     |      |
|     |                                                                                   | CS                                                              | 3                     | 3                     | 3                     | 3                     | 3                     | 3                     |      |

Survey number [   ] [   ] [   ] [   ]

Data collector ID [   ] [   ]

|                                | Variables                                                                                                       | Filters                                                     | 1 <sup>st</sup> birth | 2 <sup>nd</sup> birth | 3 <sup>rd</sup> birth | 4 <sup>th</sup> birth | 5 <sup>th</sup> birth | 6 <sup>th</sup> birth | SKIP |
|--------------------------------|-----------------------------------------------------------------------------------------------------------------|-------------------------------------------------------------|-----------------------|-----------------------|-----------------------|-----------------------|-----------------------|-----------------------|------|
| 58.                            | Complications                                                                                                   | Yes                                                         | 1                     | 1                     | 1                     | 1                     | 1                     | 1                     |      |
|                                |                                                                                                                 | No                                                          | 2                     | 2                     | 2                     | 2                     | 2                     | 2                     | 63   |
| 59.                            | Which complications?<br><br>PROBE AND RECORD<br>ALL REASONS.                                                    | Hemorrhage                                                  | 1                     | 1                     | 1                     | 1                     | 1                     | 1                     |      |
|                                |                                                                                                                 | Prolonged labor                                             | 2                     | 2                     | 2                     | 2                     | 2                     | 2                     |      |
|                                |                                                                                                                 | Obstructed labor                                            | 3                     | 3                     | 3                     | 3                     | 3                     | 3                     |      |
|                                |                                                                                                                 | Hypertensive disorder                                       | 4                     | 4                     | 4                     | 4                     | 4                     | 4                     |      |
|                                |                                                                                                                 | Puerperal infection                                         | 5                     | 5                     | 5                     | 5                     | 5                     | 5                     |      |
|                                |                                                                                                                 | Fetal distress baby                                         | 6                     | 6                     | 6                     | 6                     | 6                     | 6                     |      |
|                                |                                                                                                                 | IUFD                                                        | 7                     | 7                     | 7                     | 7                     | 7                     | 7                     |      |
|                                |                                                                                                                 | Other, namely:                                              | 99                    | 99                    | 99                    | 99                    | 99                    | 99                    |      |
| IF IT WAS A FACILITY DELIVERY: |                                                                                                                 |                                                             |                       |                       |                       |                       |                       |                       | 63   |
| 60.                            | Did you seek medical advice or treatment for these complications?                                               | Yes                                                         | 1                     | 1                     | 1                     | 1                     | 1                     | 1                     | 61   |
|                                |                                                                                                                 | No                                                          | 2                     | 2                     | 2                     | 2                     | 2                     | 2                     | 62   |
| 61.                            | Where did you seek medical advice or treatment for these complications?                                         | TBA                                                         | 1                     | 1                     | 1                     | 1                     | 1                     | 1                     | 63   |
|                                |                                                                                                                 | Health facility                                             | 2                     | 2                     | 2                     | 2                     | 2                     | 2                     |      |
|                                |                                                                                                                 | Other, namely:                                              | 99                    | 99                    | 99                    | 99                    | 99                    | 99                    |      |
| 62.                            | Why didn't you seek medical advice or treatment for these complications?<br><br>PROBE AND RECORD<br>ALL REASONS | Cost too much                                               | A                     | A                     | A                     | A                     | A                     | A                     |      |
|                                |                                                                                                                 | Facility (often) not open / possibility of onwards referral | B                     | B                     | B                     | B                     | B                     | B                     |      |
|                                |                                                                                                                 | Too far/no transportation                                   | C                     | C                     | C                     | C                     | C                     | C                     |      |
|                                |                                                                                                                 | Don't trust facility                                        | D1                    | D1                    | D1                    | D1                    | D1                    | D1                    |      |
|                                |                                                                                                                 | Poor quality of service                                     | D2                    | D2                    | D2                    | D2                    | D2                    | D2                    |      |
|                                |                                                                                                                 | No female provider at facility                              | E                     | E                     | E                     | E                     | E                     | E                     |      |
|                                |                                                                                                                 | Husband/family did not allow                                | F                     | F                     | F                     | F                     | F                     | F                     |      |
|                                |                                                                                                                 | Not necessary                                               | G                     | G                     | G                     | G                     | G                     | G                     |      |
|                                |                                                                                                                 | Not customary                                               | H                     | H                     | H                     | H                     | H                     | H                     |      |
| Other, namely:                 | 99                                                                                                              |                                                             |                       |                       |                       |                       |                       |                       |      |

| 8 - KNOWLEDGE OF PREGNANCY COMPLICATIONS & BIRTH PREPAREDNESS                                                              |      |                                        |                                                                                                                                                                                                                                                               |                                       |    |      |
|----------------------------------------------------------------------------------------------------------------------------|------|----------------------------------------|---------------------------------------------------------------------------------------------------------------------------------------------------------------------------------------------------------------------------------------------------------------|---------------------------------------|----|------|
| IF THE RESPONDENT NEVER HAD ANC, SKIP TO                                                                                   |      |                                        |                                                                                                                                                                                                                                                               |                                       |    | 64   |
| Nr                                                                                                                         | DHS  | Variable                               | Questions & filters                                                                                                                                                                                                                                           | Coding categories                     |    | Skip |
| 63.                                                                                                                        | 414  | Health education complications         | During any of your ANC visits, where you told the signs of pregnancy complications?<br><br>IF UNCLEAR, EXPLAIN: Complications of pregnancy are health problems that occur during pregnancy. They can involve the mother's health, the baby's health, or both. | Yes                                   | 1  |      |
|                                                                                                                            |      |                                        |                                                                                                                                                                                                                                                               | No                                    | 2  |      |
| 64.                                                                                                                        | 414A | Knowledge pregnancy-complications      | Can you tell me any signs of pregnancy complications?<br><br>GIVE THE RESPONDENT TIME TO THINK FIRST, THEN PROBE. RECORD ALL ANSWERS.                                                                                                                         | Vaginal bleeding                      | A  |      |
|                                                                                                                            |      |                                        |                                                                                                                                                                                                                                                               | Vaginal flush of fluid                | B  |      |
|                                                                                                                            |      |                                        |                                                                                                                                                                                                                                                               | Severe headache                       | C  |      |
|                                                                                                                            |      |                                        |                                                                                                                                                                                                                                                               | Blurred vision                        | D  |      |
|                                                                                                                            |      |                                        |                                                                                                                                                                                                                                                               | Fever                                 | E  |      |
|                                                                                                                            |      |                                        |                                                                                                                                                                                                                                                               | Abdominal pain / preterm contractions | F  |      |
|                                                                                                                            |      |                                        |                                                                                                                                                                                                                                                               | Decreased fetal movement              | G  |      |
|                                                                                                                            |      |                                        |                                                                                                                                                                                                                                                               | Edema/body swelling                   | H  |      |
|                                                                                                                            |      |                                        |                                                                                                                                                                                                                                                               | Other, specify:                       | 99 |      |
| IF THE RESPONDENT DOESN'T KNOW SIGNS OF PREGNANCY COMPLICATIONS, PLEASE NAME THEM BEFORE CONTINUING WITH THE NEXT QUESTION |      |                                        |                                                                                                                                                                                                                                                               |                                       |    |      |
| IF THE RESPONDENT NEVER HAD ANC, SKIP TO                                                                                   |      |                                        |                                                                                                                                                                                                                                                               |                                       |    | 66   |
| 65.                                                                                                                        |      | Health education birth preparedness    | During any of your ANC visits, where you advised about birth preparedness?<br><br>IF THE RESPONDENT DOESN'T KNOW WHAT IT MEANS, EXPLAIN THE CONCEPT.                                                                                                          | Yes                                   | 1  |      |
|                                                                                                                            |      |                                        |                                                                                                                                                                                                                                                               | No                                    | 2  |      |
| 66.                                                                                                                        |      | BP: Advance planning place of delivery | During your pregnancies, did you plan in advance where you wanted to give birth?                                                                                                                                                                              | Yes                                   | 1  |      |
|                                                                                                                            |      |                                        |                                                                                                                                                                                                                                                               | No                                    | 2  | 73   |
| 67.                                                                                                                        |      | BP: planned place of delivery          | Where did you plan to give birth?                                                                                                                                                                                                                             | Home                                  | 1  | 68   |
|                                                                                                                            |      |                                        |                                                                                                                                                                                                                                                               | Health facility                       | 2  | 69   |
|                                                                                                                            |      |                                        |                                                                                                                                                                                                                                                               | Other, namely                         | 99 |      |
| 68.                                                                                                                        |      | BP: Trained BA                         | Did you identify a trained birth attendant?                                                                                                                                                                                                                   | Yes                                   | 1  |      |
|                                                                                                                            |      |                                        |                                                                                                                                                                                                                                                               | No                                    | 2  |      |
| 69.                                                                                                                        |      | BP: HF                                 | Did you identify a health facility (for an obstetric emergency)?                                                                                                                                                                                              | Yes                                   | 1  |      |
|                                                                                                                            |      |                                        |                                                                                                                                                                                                                                                               | No                                    | 2  |      |
| 70.                                                                                                                        |      | BP transport                           | Did you identify a mode of transport to the facility (for obstetric emergency)?                                                                                                                                                                               | Yes                                   | 1  |      |
|                                                                                                                            |      |                                        |                                                                                                                                                                                                                                                               | No                                    | 2  |      |

|     |  |                 |                                                                                                                                                                             |     |   |  |
|-----|--|-----------------|-----------------------------------------------------------------------------------------------------------------------------------------------------------------------------|-----|---|--|
| 71. |  | BP: money       | Did you save money for the delivery and/or an emergency?                                                                                                                    | Yes | 1 |  |
|     |  |                 |                                                                                                                                                                             | No  | 2 |  |
| 72. |  | BP: blood donor | Did you identify a blood donor?<br><br>EXPLAIN: in case of an emergency, you may need blood from a donor, which should be the same as your own blood type (e.g. A+, B or O) | Yes | 1 |  |
|     |  |                 |                                                                                                                                                                             | No  | 2 |  |

### 9 - Perceived risk

| Nr  | DHS | Variable              | Questions & filters                                                                                            | Coding categories |   | Skip |
|-----|-----|-----------------------|----------------------------------------------------------------------------------------------------------------|-------------------|---|------|
| 73. |     | Perceived risk mother | Where do believe that you run the greatest risk during a delivery, at home or in a health facility?            | Home              | 1 |      |
|     |     |                       |                                                                                                                | Health facility   | 2 |      |
| 74. |     | Perceived risk - baby | Where do you believe that your baby runs the greatest risk during a delivery, at home or in a health facility? | Home              | 1 |      |
|     |     |                       |                                                                                                                | Health facility   | 2 |      |

### 10 - Health Services & Community Context

EXPLAIN: Now I would like to ask about all the health services in your community and about your experiences with those services

| Nr  | DHS | Variable                    | Questions & filters                                                                                                                   | Coding categories |    | Skip |
|-----|-----|-----------------------------|---------------------------------------------------------------------------------------------------------------------------------------|-------------------|----|------|
| 75. |     | Travel time Health Post     | What is the travel time from your household to the nearest Health Post?<br><br>RECORD THE TOTAL TIME IN MINUTES AND/OR HOURS          | Minutes           |    |      |
|     |     |                             |                                                                                                                                       | Hours             |    |      |
|     |     |                             |                                                                                                                                       | No HP             | 98 |      |
|     |     |                             |                                                                                                                                       |                   |    |      |
| 76. |     | Travel time Health Center   | What is the travel time from your household to the nearest Health Center?                                                             | Minutes           |    |      |
|     |     |                             |                                                                                                                                       | Hours             |    |      |
|     |     |                             |                                                                                                                                       | No HC             | 98 |      |
| 77. |     | Travel time Hospital        | What is the travel time from your household to the nearest Hospital?                                                                  | Minutes           |    |      |
|     |     |                             |                                                                                                                                       | Hours             |    |      |
| 78. |     | Emergency transport         | Once labor has started at home, how easy or difficult is it to find transport?                                                        | Very easy         | 1  |      |
|     |     |                             |                                                                                                                                       | Easy              | 2  |      |
|     |     |                             |                                                                                                                                       | Difficult         | 3  |      |
|     |     |                             |                                                                                                                                       | Very difficult    | 4  |      |
| 79. |     | Emergency mode of transport | In case of an emergency during home delivery, what mode of transport is used for the majority of the journey to the nearest hospital? | Walking / Carried | 1  |      |
|     |     |                             |                                                                                                                                       | Horse             | 2  |      |
|     |     |                             |                                                                                                                                       | Public transport  | 3  |      |
|     |     |                             |                                                                                                                                       | Private transport | 4  |      |
|     |     |                             |                                                                                                                                       | Ambulance         | 5  |      |

| 11 - Perceived quality of maternal & child services |     |                                               |                                                                                                                                                                                                                                                                                                                                                                                                                                                                                                                                    |                                |    |      |
|-----------------------------------------------------|-----|-----------------------------------------------|------------------------------------------------------------------------------------------------------------------------------------------------------------------------------------------------------------------------------------------------------------------------------------------------------------------------------------------------------------------------------------------------------------------------------------------------------------------------------------------------------------------------------------|--------------------------------|----|------|
| Nr                                                  | DHS | Variable                                      | Questions & filters                                                                                                                                                                                                                                                                                                                                                                                                                                                                                                                | Coding categories              |    | Skip |
| 80.                                                 |     | Nearest hospital                              | Which hospital is closest to your home?                                                                                                                                                                                                                                                                                                                                                                                                                                                                                            | Attat Hospital (NGO)           | A  |      |
|                                                     |     |                                               |                                                                                                                                                                                                                                                                                                                                                                                                                                                                                                                                    | Butajira Hospital (Govt)       | B  |      |
|                                                     |     |                                               |                                                                                                                                                                                                                                                                                                                                                                                                                                                                                                                                    | Mercy Hospital (NGO)           | M  |      |
|                                                     |     |                                               |                                                                                                                                                                                                                                                                                                                                                                                                                                                                                                                                    | Other, specify:                | 99 |      |
| 81.                                                 |     | Utilization hospital                          | Did you ever go to this hospital?                                                                                                                                                                                                                                                                                                                                                                                                                                                                                                  | Yes                            | 1  |      |
|                                                     |     |                                               |                                                                                                                                                                                                                                                                                                                                                                                                                                                                                                                                    | No                             | 2  | 84   |
| 82.                                                 |     | Utilization MCH at hospital                   | Have you ever been to this hospital for maternal & child health services (ANC, ultrasound, delivery care, post-natal care)?                                                                                                                                                                                                                                                                                                                                                                                                        | Yes                            | 1  |      |
|                                                     |     |                                               |                                                                                                                                                                                                                                                                                                                                                                                                                                                                                                                                    | No                             | 2  | 84   |
| 83.                                                 |     | Utilization types of MCH services at hospital | Which maternal & childcare services did you use at the hospital?<br><br><u>ANC</u> : medical care for pregnant women during their pregnancy.<br><u>Ultrasound</u> : a machine that allows to see how a baby is developing in the womb. Gel is put on your belly and a probe moves around, which creates a picture of your baby on the machine.<br><u>Delivery care</u> : giving birth with a skilled birth attendant.<br><u>Post-natal care</u> : care to mother and child after the baby is born.<br><br>RECORD ALL SERVICES USED | ANC                            | A  | 85   |
|                                                     |     |                                               |                                                                                                                                                                                                                                                                                                                                                                                                                                                                                                                                    | Ultrasound                     | B  |      |
|                                                     |     |                                               |                                                                                                                                                                                                                                                                                                                                                                                                                                                                                                                                    | Delivery care                  | C  |      |
|                                                     |     |                                               |                                                                                                                                                                                                                                                                                                                                                                                                                                                                                                                                    | Post-natal care                | D  |      |
| 84.                                                 |     | Reasons for non-utilization (MCH at) hospital | What is your reason for not going to the hospital (for MCH services)?<br><br>RECORD ALL REASONS.                                                                                                                                                                                                                                                                                                                                                                                                                                   | Cost too much                  | A  | 97   |
|                                                     |     |                                               |                                                                                                                                                                                                                                                                                                                                                                                                                                                                                                                                    | Facility not open              | B  |      |
|                                                     |     |                                               |                                                                                                                                                                                                                                                                                                                                                                                                                                                                                                                                    | Too far/no transportation      | C  |      |
|                                                     |     |                                               |                                                                                                                                                                                                                                                                                                                                                                                                                                                                                                                                    | Don't trust facility           | D1 |      |
|                                                     |     |                                               |                                                                                                                                                                                                                                                                                                                                                                                                                                                                                                                                    | Poor quality of service        | D2 |      |
|                                                     |     |                                               |                                                                                                                                                                                                                                                                                                                                                                                                                                                                                                                                    | No female provider at facility | E  |      |
|                                                     |     |                                               |                                                                                                                                                                                                                                                                                                                                                                                                                                                                                                                                    | Husband/family did not allow   | F  |      |
|                                                     |     |                                               |                                                                                                                                                                                                                                                                                                                                                                                                                                                                                                                                    | Not necessary                  | G  |      |
|                                                     |     |                                               |                                                                                                                                                                                                                                                                                                                                                                                                                                                                                                                                    | Not customary                  | H  |      |
|                                                     |     |                                               |                                                                                                                                                                                                                                                                                                                                                                                                                                                                                                                                    | Other, specify                 | 99 |      |

|     |  |                                                              |                                                                                                                                                                                                                          |              |   |  |
|-----|--|--------------------------------------------------------------|--------------------------------------------------------------------------------------------------------------------------------------------------------------------------------------------------------------------------|--------------|---|--|
|     |  |                                                              | How do you perceive the quality of maternal & childcare at the hospital with regard to the following services? Please be frank, as it will help us improve our services to you and other patients.                       |              |   |  |
| 85. |  | Perceived quality of care MCH hospital - overall             | <ul style="list-style-type: none"> <li>Overall service</li> </ul>                                                                                                                                                        | Good         | 4 |  |
|     |  |                                                              |                                                                                                                                                                                                                          | Satisfactory | 3 |  |
|     |  |                                                              |                                                                                                                                                                                                                          | Reasonable   | 2 |  |
|     |  |                                                              |                                                                                                                                                                                                                          | Poor         | 1 |  |
| 86. |  | Perceived quality of care MCH hospital - supplies            | <ul style="list-style-type: none"> <li>Availability of supplies: drugs, blood, other medical materials</li> </ul>                                                                                                        | Good         | 4 |  |
|     |  |                                                              |                                                                                                                                                                                                                          | Satisfactory | 3 |  |
|     |  |                                                              |                                                                                                                                                                                                                          | Reasonable   | 2 |  |
|     |  |                                                              |                                                                                                                                                                                                                          | Poor         | 1 |  |
| 87. |  | Perceived quality of care MCH hospital – waiting times       | <ul style="list-style-type: none"> <li>Waiting times</li> </ul>                                                                                                                                                          | Good         | 4 |  |
|     |  |                                                              |                                                                                                                                                                                                                          | Satisfactory | 3 |  |
|     |  |                                                              |                                                                                                                                                                                                                          | Reasonable   | 2 |  |
|     |  |                                                              |                                                                                                                                                                                                                          | Poor         | 1 |  |
| 88. |  | Perceived quality of care MCH hospital – quality staff       | <ul style="list-style-type: none"> <li>Professionalism of staff</li> </ul>                                                                                                                                               | Good         | 4 |  |
|     |  |                                                              |                                                                                                                                                                                                                          | Satisfactory | 3 |  |
|     |  |                                                              |                                                                                                                                                                                                                          | Reasonable   | 2 |  |
|     |  |                                                              |                                                                                                                                                                                                                          | Poor         | 1 |  |
| 89. |  | Perceived quality of care MCH hospital – friendliness staff  | <ul style="list-style-type: none"> <li>Friendliness of staff</li> </ul>                                                                                                                                                  | Good         | 4 |  |
|     |  |                                                              |                                                                                                                                                                                                                          | Satisfactory | 3 |  |
|     |  |                                                              |                                                                                                                                                                                                                          | Reasonable   | 2 |  |
|     |  |                                                              |                                                                                                                                                                                                                          | Poor         | 1 |  |
| 90. |  | Perceived quality of care MCH hospital – respect preferences | <ul style="list-style-type: none"> <li>Respect for preferences</li> </ul>                                                                                                                                                | Good         | 4 |  |
|     |  |                                                              |                                                                                                                                                                                                                          | Satisfactory | 3 |  |
|     |  |                                                              |                                                                                                                                                                                                                          | Reasonable   | 2 |  |
|     |  |                                                              |                                                                                                                                                                                                                          | Poor         | 1 |  |
| 91. |  | Perceived quality of care MCH hospital – privacy             | <ul style="list-style-type: none"> <li>Privacy</li> </ul>                                                                                                                                                                | Good         | 4 |  |
|     |  |                                                              |                                                                                                                                                                                                                          | Satisfactory | 3 |  |
|     |  |                                                              |                                                                                                                                                                                                                          | Reasonable   | 2 |  |
|     |  |                                                              |                                                                                                                                                                                                                          | Poor         | 1 |  |
| 92. |  | Perceived quality of care MCH hospital - hygiene             | <ul style="list-style-type: none"> <li>Hygiene</li> </ul>                                                                                                                                                                | Good         | 4 |  |
|     |  |                                                              |                                                                                                                                                                                                                          | Satisfactory | 3 |  |
|     |  |                                                              |                                                                                                                                                                                                                          | Reasonable   | 2 |  |
|     |  |                                                              |                                                                                                                                                                                                                          | Poor         | 1 |  |
| 93. |  | Perceived quality of care MCH hospital - language            | <ul style="list-style-type: none"> <li>Own language spoken</li> </ul>                                                                                                                                                    | Yes          | 1 |  |
|     |  |                                                              |                                                                                                                                                                                                                          | No           | 2 |  |
| 94. |  | Perceived quality of care MCH hospital - discrimination      | <ul style="list-style-type: none"> <li>Discrimination against certain groups</li> </ul> <p>EXPLAIN: Sometimes, some people discriminate against others based on ethnicity, living standard and/or diseases like HIV.</p> | Yes          | 1 |  |
|     |  |                                                              |                                                                                                                                                                                                                          | No           | 2 |  |
| 95. |  | Perceived                                                    | <ul style="list-style-type: none"> <li>Cost</li> </ul>                                                                                                                                                                   | Affordable   | 1 |  |

|     |  |                                     |                                                               |                |   |  |
|-----|--|-------------------------------------|---------------------------------------------------------------|----------------|---|--|
|     |  | quality of care MCH hospital - cost |                                                               | Not affordable | 2 |  |
| 96. |  | Recommendation MCH Hospital         | Would you recommend the MCH services to other pregnant women? | Yes            | 1 |  |
|     |  |                                     |                                                               | No             | 2 |  |

| 12 A - MWH for non-MWH women                                                                                                                                                                                                                                                                                                                                                                                    |     |                                                                                                                                                                 |                                                                                                                          |                                        |    |      |
|-----------------------------------------------------------------------------------------------------------------------------------------------------------------------------------------------------------------------------------------------------------------------------------------------------------------------------------------------------------------------------------------------------------------|-----|-----------------------------------------------------------------------------------------------------------------------------------------------------------------|--------------------------------------------------------------------------------------------------------------------------|----------------------------------------|----|------|
| Nr                                                                                                                                                                                                                                                                                                                                                                                                              | DHS | Variable                                                                                                                                                        | Questions & filters                                                                                                      | Coding categories                      |    | Skip |
| 97.                                                                                                                                                                                                                                                                                                                                                                                                             |     | Knowledge MWH                                                                                                                                                   | Have you ever heard of a Maternity Waiting Home?                                                                         | Yes                                    | 1  |      |
|                                                                                                                                                                                                                                                                                                                                                                                                                 |     |                                                                                                                                                                 |                                                                                                                          | No                                     | 2  | 101  |
| NOW YOU ALWAYS EXPLAIN/COMPLETE THE CONCEPT OF A MWH: A Maternity Waiting Home is a place for high-risk pregnant women to await birth in their last weeks of pregnancy, close to 24/7 emergency obstetric care. Possible reasons to stay are for example a previous caesarean section or hemorrhage, previous stillbirth or neonatal death, breech presentation, twin pregnancy, or living far from a hospital. |     |                                                                                                                                                                 |                                                                                                                          |                                        |    |      |
| 98.                                                                                                                                                                                                                                                                                                                                                                                                             |     | Knowledge MWH: availability                                                                                                                                     | Is a MWH available in your region?                                                                                       | Yes                                    | 1  |      |
|                                                                                                                                                                                                                                                                                                                                                                                                                 |     |                                                                                                                                                                 |                                                                                                                          | No                                     | 2  | 101  |
| 99.                                                                                                                                                                                                                                                                                                                                                                                                             |     | Location MWH                                                                                                                                                    | Where is the MWH located?                                                                                                | Attat Hospital                         | A  |      |
|                                                                                                                                                                                                                                                                                                                                                                                                                 |     |                                                                                                                                                                 |                                                                                                                          | Mercy Hospital                         | M  |      |
|                                                                                                                                                                                                                                                                                                                                                                                                                 |     |                                                                                                                                                                 |                                                                                                                          | Other, specify:                        | 99 |      |
| 100.                                                                                                                                                                                                                                                                                                                                                                                                            |     | Stay MWH                                                                                                                                                        | Did you ever stay at a Maternity Waiting Home?                                                                           | Yes                                    | 1  | 116  |
|                                                                                                                                                                                                                                                                                                                                                                                                                 |     |                                                                                                                                                                 |                                                                                                                          | No                                     | 2  |      |
| 101.                                                                                                                                                                                                                                                                                                                                                                                                            |     | Knowledge MWH: advantages                                                                                                                                       | What do you think the advantages are of staying at a MWH?                                                                | Closeness to emergency obstetrics care | 1  |      |
|                                                                                                                                                                                                                                                                                                                                                                                                                 |     |                                                                                                                                                                 | RECORD ALL ANSWERS.                                                                                                      | Saving life of mother                  | 2  |      |
|                                                                                                                                                                                                                                                                                                                                                                                                                 |     |                                                                                                                                                                 |                                                                                                                          | Saving life of baby                    | 3  |      |
|                                                                                                                                                                                                                                                                                                                                                                                                                 |     |                                                                                                                                                                 |                                                                                                                          | Calmness, rest before delivery         | 4  |      |
|                                                                                                                                                                                                                                                                                                                                                                                                                 |     |                                                                                                                                                                 |                                                                                                                          | Other, specify                         | 99 |      |
|                                                                                                                                                                                                                                                                                                                                                                                                                 |     |                                                                                                                                                                 |                                                                                                                          | Don't know                             | 98 |      |
| IF THE RESPONDENT CANNOT THINK OF ANY ADVANTAGES, EXPLAIN THE ADVANTAGES.                                                                                                                                                                                                                                                                                                                                       |     |                                                                                                                                                                 |                                                                                                                          |                                        |    |      |
| 102.                                                                                                                                                                                                                                                                                                                                                                                                            |     | Likelihood stay MWH                                                                                                                                             | For your current/next pregnancy, how likely is it that you will stay at a MWH the last 2-4 weeks prior to your delivery? | Very likely                            | 1  |      |
|                                                                                                                                                                                                                                                                                                                                                                                                                 |     |                                                                                                                                                                 |                                                                                                                          | Likely                                 | 2  |      |
|                                                                                                                                                                                                                                                                                                                                                                                                                 |     |                                                                                                                                                                 |                                                                                                                          | Somewhat unlikely                      | 3  |      |
|                                                                                                                                                                                                                                                                                                                                                                                                                 |     |                                                                                                                                                                 |                                                                                                                          | Very unlikely                          | 4  |      |
|                                                                                                                                                                                                                                                                                                                                                                                                                 |     | EXPLAIN: Now imagine you have to stay at the MWH for 2-4 weeks prior to your expected delivery date. How will it be for you to make the following arrangements? |                                                                                                                          |                                        |    |      |
| 103.                                                                                                                                                                                                                                                                                                                                                                                                            |     | Barrier MWH transport                                                                                                                                           | • Transport to and from MWH                                                                                              | Affordable                             | 1  |      |
|                                                                                                                                                                                                                                                                                                                                                                                                                 |     |                                                                                                                                                                 |                                                                                                                          | Not affordable                         | 2  |      |
| 104.                                                                                                                                                                                                                                                                                                                                                                                                            |     | Barrier MWH food                                                                                                                                                | • Food while staying at MWH                                                                                              | Affordable                             | 1  |      |
|                                                                                                                                                                                                                                                                                                                                                                                                                 |     |                                                                                                                                                                 |                                                                                                                          | Not affordable                         | 2  |      |
| 105.                                                                                                                                                                                                                                                                                                                                                                                                            |     | Barrier MWH utensils                                                                                                                                            | • Bringing own cooking utensils                                                                                          | Possible                               | 1  |      |
|                                                                                                                                                                                                                                                                                                                                                                                                                 |     |                                                                                                                                                                 |                                                                                                                          | Impossible                             | 2  |      |
| 106.                                                                                                                                                                                                                                                                                                                                                                                                            |     | Barrier MWH                                                                                                                                                     | • Staying for 2-4 weeks before                                                                                           | Possible                               | 1  |      |

|      |  |                                             |                                                                                                                   |               |    |               |
|------|--|---------------------------------------------|-------------------------------------------------------------------------------------------------------------------|---------------|----|---------------|
|      |  | waiting time respondent                     | delivery date                                                                                                     | Not possible  | 2  |               |
| 107. |  | Barrier MWH waiting time attendant          | <ul style="list-style-type: none"> <li>Bringing an attendant for at least 2 weeks before delivery date</li> </ul> | Possible      | 1  |               |
|      |  |                                             |                                                                                                                   | Not possible  | 2  |               |
| 108. |  | Barrier MWH children at home                | <ul style="list-style-type: none"> <li>Children are taken care of by other family members / community</li> </ul>  | Possible      | 1  |               |
|      |  |                                             |                                                                                                                   | Not possible  | 2  |               |
| 109. |  | Barrier MWH household chores                | <ul style="list-style-type: none"> <li>Household chores are taken care of by family / community</li> </ul>        | Possible      | 1  |               |
|      |  |                                             |                                                                                                                   | Not possible  | 2  |               |
| 110. |  | Barrier MWH loss from productivity activity | <ul style="list-style-type: none"> <li>Being away from your work (other than household chores)</li> </ul>         | Possible      | 1  |               |
|      |  |                                             |                                                                                                                   | Not possible  | 2  |               |
| 111. |  | Barrier MWH attendant loss productivity     | <ul style="list-style-type: none"> <li>Attendant being away from other work / obligations</li> </ul>              | Possible      | 1  |               |
|      |  |                                             |                                                                                                                   | Not possible  | 2  |               |
| 112. |  | Barrier MWH dependent child                 | <ul style="list-style-type: none"> <li>Bringing a child to MWH</li> </ul>                                         | Necessary     | 1  |               |
|      |  |                                             |                                                                                                                   | Not necessary | 2  |               |
| 113. |  | Barrier MWH family visits                   | <ul style="list-style-type: none"> <li>Visits from family members</li> </ul>                                      | Necessary     | 1  |               |
|      |  |                                             |                                                                                                                   | Not necessary | 2  |               |
| 114. |  | Other barriers MWH                          | Are there any other challenges to staying at a MWH?                                                               | Yes           | 1  |               |
|      |  |                                             |                                                                                                                   | No            | 2  | End of survey |
| 115. |  | Other barriers specified                    | If yes, please explain what these challenges are.                                                                 |               | 99 | End of survey |

| 12 B - MWH for MWH-women |     |                      |                                                                                                                                                                                    |                                   |    |      |
|--------------------------|-----|----------------------|------------------------------------------------------------------------------------------------------------------------------------------------------------------------------------|-----------------------------------|----|------|
| Nr                       | DHS | Variable             | Questions & filters                                                                                                                                                                | Coding categories                 |    | Skip |
| 116.                     |     | Location stay MWH    | Which MWH did you stay?                                                                                                                                                            | Attat Hospital                    | A  |      |
|                          |     |                      |                                                                                                                                                                                    | Mercy Hospital                    | M  |      |
|                          |     |                      |                                                                                                                                                                                    | Other, specify:                   | 99 |      |
| 117.                     |     | Reason admission MWH | What was the reason for your admission to the MWH?<br><br>IF THE RESPONDENT DOES NOT KNOW THE ANSWER: ASK YOUR SUPERVISOR TO CHECK THE MEDICAL FILE AND THEN RECORD THE ANSWER(S). | Previous caesarean section        | 1  |      |
|                          |     |                      |                                                                                                                                                                                    | Previous obstetric fistula repair | 2  |      |
|                          |     |                      |                                                                                                                                                                                    | Multiple pregnancy                | 3  |      |
|                          |     |                      |                                                                                                                                                                                    | Grand multiparity                 | 4  |      |
|                          |     |                      |                                                                                                                                                                                    | Previous stillbirth/neonatal loss | 5  |      |
|                          |     |                      |                                                                                                                                                                                    | Malpresentations                  | 6  |      |
|                          |     |                      |                                                                                                                                                                                    | Breech presentation               | 7  |      |
|                          |     |                      |                                                                                                                                                                                    | Antepartum hemorrhage             | 8  |      |
|                          |     |                      |                                                                                                                                                                                    | Anemia                            | 9  |      |
|                          |     |                      |                                                                                                                                                                                    | Polyhydramnios                    | 10 |      |

|      |  |                       |                                                                                                                                                                                              |                                                                |    |  |
|------|--|-----------------------|----------------------------------------------------------------------------------------------------------------------------------------------------------------------------------------------|----------------------------------------------------------------|----|--|
|      |  |                       |                                                                                                                                                                                              | Preeclampsia/medical problems                                  | 11 |  |
|      |  |                       |                                                                                                                                                                                              | Living far away from a hospital with emergency obstetrics care | 12 |  |
|      |  |                       |                                                                                                                                                                                              | Other, specify:                                                | 99 |  |
| 118. |  | Referral to MWH       | From where were you referred to the MWH?                                                                                                                                                     | HEW                                                            | 1  |  |
|      |  |                       |                                                                                                                                                                                              | HP                                                             | 2  |  |
|      |  |                       |                                                                                                                                                                                              | HC                                                             | 3  |  |
|      |  |                       |                                                                                                                                                                                              | Hospital                                                       | 4  |  |
|      |  |                       |                                                                                                                                                                                              | Other, specify:                                                | 99 |  |
| 119. |  | Duration stay MWH     | How long did you stay in the MWH?<br><br>RECORD THE NUMBER OF WEEKS IN HALF AND/OR WHOLE NUMBERS.<br><br>IF THE RESPONDENT IS STILL STAYING AT THE MWH, RECORD THE LENGTH OF STAY UNTIL NOW. | Length of stay                                                 |    |  |
| 120. |  | Decision-making MWH   | Who made the decision to stay at the MWH?                                                                                                                                                    | Respondent                                                     | 1  |  |
|      |  |                       |                                                                                                                                                                                              | Husband/partner                                                | 2  |  |
|      |  |                       |                                                                                                                                                                                              | Jointly                                                        | 3  |  |
|      |  |                       |                                                                                                                                                                                              | Other, specify                                                 | 99 |  |
| 121. |  | Attendant MWH         | Who was your attendant during your stay at the MWH?                                                                                                                                          | Husband/partner                                                | 1  |  |
|      |  |                       |                                                                                                                                                                                              | Other family member                                            | 2  |  |
|      |  |                       |                                                                                                                                                                                              | Other, specify:                                                | 99 |  |
| 122. |  | Financial support MWH | Who provided financial support during your stay at the MWH? (Transport, food, medications)                                                                                                   | Respondent                                                     | 1  |  |
|      |  |                       |                                                                                                                                                                                              | Husband                                                        | 2  |  |
|      |  |                       |                                                                                                                                                                                              | Other family member                                            | 3  |  |
|      |  |                       |                                                                                                                                                                                              | Other, specify                                                 | 99 |  |
| 123. |  | Social support MWH    | Who provided social support during your stay at the MWH? (Taking care of children, household chores and/or other work, emotional support)                                                    | Husband                                                        | 1  |  |
|      |  |                       |                                                                                                                                                                                              | Other family member                                            | 2  |  |
|      |  |                       |                                                                                                                                                                                              | Other, specify                                                 | 99 |  |
| 124. |  | Advantages MWH        | What are the advantages of staying at a MWH?<br><br>RECORD ALL REASONS MENTIONED.                                                                                                            | Closeness to emergency obstetrics care                         | 1  |  |
|      |  |                       |                                                                                                                                                                                              | Saving life of mother                                          | 2  |  |
|      |  |                       |                                                                                                                                                                                              | Saving life of baby                                            | 3  |  |
|      |  |                       |                                                                                                                                                                                              | Calmness, rest before delivery                                 | 4  |  |
|      |  |                       |                                                                                                                                                                                              | Other, specify                                                 | 99 |  |

|      |  |                                             |                                                                                                                                                                             |                |    |  |
|------|--|---------------------------------------------|-----------------------------------------------------------------------------------------------------------------------------------------------------------------------------|----------------|----|--|
|      |  |                                             | EXPLAIN: I would appreciate if you gave us your opinion about the following items. Please be frank with me, as it will allow the hospital to improve its services.          |                |    |  |
| 125. |  | Barrier MWH transport                       | <ul style="list-style-type: none"> <li>Transport to and from MWH</li> </ul>                                                                                                 | Affordable     | 1  |  |
|      |  |                                             |                                                                                                                                                                             | Not affordable | 2  |  |
| 126. |  | Barrier MWH food                            | <ul style="list-style-type: none"> <li>Food while staying at MWH</li> </ul>                                                                                                 | Affordable     | 1  |  |
|      |  |                                             |                                                                                                                                                                             | Not affordable | 2  |  |
| 127. |  | Barrier MWH utensils                        | <ul style="list-style-type: none"> <li>Bringing own cooking utensils</li> </ul>                                                                                             | Possible       | 1  |  |
|      |  |                                             |                                                                                                                                                                             | Not possible   | 2  |  |
| 128. |  | Barrier MWH waiting time respondent         | <ul style="list-style-type: none"> <li>Staying for 2-4 weeks before delivery date</li> </ul>                                                                                | Possible       | 1  |  |
|      |  |                                             |                                                                                                                                                                             | Not possible   | 2  |  |
| 129. |  | Barrier MWH waiting time attendant          | <ul style="list-style-type: none"> <li>Bringing an attendant for at least 2 weeks before delivery date</li> </ul>                                                           | Possible       | 1  |  |
|      |  |                                             |                                                                                                                                                                             | Not possible   | 2  |  |
| 130. |  | Barrier MWH children at home                | <ul style="list-style-type: none"> <li>Children are taken care of by other family members / community</li> </ul>                                                            | Possible       | 1  |  |
|      |  |                                             |                                                                                                                                                                             | Not possible   | 2  |  |
| 131. |  | Barrier MWH household chores                | <ul style="list-style-type: none"> <li>Household chores are taken care of by family / community</li> </ul>                                                                  | Possible       | 1  |  |
|      |  |                                             |                                                                                                                                                                             | Not possible   | 2  |  |
| 132. |  | Barrier MWH loss from productivity activity | <ul style="list-style-type: none"> <li>Being away from your work (other than household chores)</li> </ul>                                                                   | Possible       | 1  |  |
|      |  |                                             |                                                                                                                                                                             | Not possible   | 2  |  |
| 133. |  | Barrier MWH attendant loss productivity     | <ul style="list-style-type: none"> <li>Attendant being away from other work / obligations</li> </ul>                                                                        | Possible       | 1  |  |
|      |  |                                             |                                                                                                                                                                             | Not possible   | 2  |  |
| 134. |  | Barrier MWH dependent child                 | <ul style="list-style-type: none"> <li>Bringing a child to MWH</li> </ul>                                                                                                   | Necessary      | 1  |  |
|      |  |                                             |                                                                                                                                                                             | Not necessary  | 2  |  |
| 135. |  | Barrier MWH family visits                   | <ul style="list-style-type: none"> <li>Visits from family members</li> </ul>                                                                                                | Necessary      | 1  |  |
|      |  |                                             |                                                                                                                                                                             | Not necessary  | 2  |  |
| 136. |  | Other barriers MWH                          | Are there any other challenges to staying at the MWH?                                                                                                                       | Yes            | 1  |  |
|      |  |                                             |                                                                                                                                                                             | No             | 2  |  |
| 137. |  | Other barriers MWH specified                | If yes, please explain what these challenges are.                                                                                                                           |                | 99 |  |
|      |  |                                             | How do you perceive the quality of care at the MWH with regard to the following services? Please be frank as it will help us improve our services to you and other patients |                |    |  |
| 138. |  | Perceived quality MWH facilities            | <ul style="list-style-type: none"> <li>Facilities: accommodation, equipment, supplies</li> </ul>                                                                            | Good           | 4  |  |
|      |  |                                             |                                                                                                                                                                             | Satisfactory   | 3  |  |
|      |  |                                             |                                                                                                                                                                             | Reasonable     | 2  |  |
|      |  |                                             |                                                                                                                                                                             | Poor           | 1  |  |
| 139. |  | Quality MWH hygiene                         | <ul style="list-style-type: none"> <li>Hygiene</li> </ul>                                                                                                                   | Good           | 4  |  |
|      |  |                                             |                                                                                                                                                                             | Satisfactory   | 3  |  |
|      |  |                                             |                                                                                                                                                                             | Reasonable     | 2  |  |
|      |  |                                             |                                                                                                                                                                             | Poor           | 1  |  |
| 140. |  | Perceived quality MWH privacy               | <ul style="list-style-type: none"> <li>Privacy</li> </ul>                                                                                                                   | Good           | 4  |  |
|      |  |                                             |                                                                                                                                                                             | Satisfactory   | 3  |  |
|      |  |                                             |                                                                                                                                                                             | Reasonable     | 2  |  |

Survey number [   ] [   ] [   ] [   ]

Data collector ID [   ] [   ]

|             |  |                                        |                                                                                   |              |    |               |
|-------------|--|----------------------------------------|-----------------------------------------------------------------------------------|--------------|----|---------------|
|             |  |                                        |                                                                                   | Poor         | 1  |               |
| <b>141.</b> |  | Perceived quality MWH support women    | <ul style="list-style-type: none"> <li>Support from other MWH women</li> </ul>    | Good         | 4  |               |
|             |  |                                        |                                                                                   | Satisfactory | 3  |               |
|             |  |                                        |                                                                                   | Reasonable   | 2  |               |
|             |  |                                        |                                                                                   | Poor         | 1  |               |
| <b>142.</b> |  | Perceived quality MWH space attendants | <ul style="list-style-type: none"> <li>Space for attendants / visitors</li> </ul> | Good         | 4  |               |
|             |  |                                        |                                                                                   | Satisfactory | 3  |               |
|             |  |                                        |                                                                                   | Reasonable   | 2  |               |
|             |  |                                        |                                                                                   | Poor         | 1  |               |
| <b>143.</b> |  | MWH areas improvement                  | What are areas for improvement of the MWH?                                        |              | 99 |               |
| <b>144.</b> |  | Recommendation MWH                     | Would you recommend the MWH to other pregnant women?                              | Yes          | 1  | End of survey |
|             |  |                                        |                                                                                   | No           | 2  |               |
